# Supplementary material for: Multicentre evaluation of renal impairment in thoracic surgery (MERITS): a retrospective cohort study
Source: PubMed Central journal article supplement — BMJ Open. 2022 Sep 27;12(9):e058542. doi: 10.1136/bmjopen-2021-058542 (PMC9516206; doi:10.1136/bmjopen-2021-058542), 2022-09-27
Supplement: bmjopen-2021-058542.draft_revisions.pdf [file bmjopen-2021-058542.draft_revisions.pdf]

# BMJ Open

BMJ Open is committed to open peer review. As part of this commitment we make the peer review history of every article we publish publicly available.

When an article is published we post the peer reviewers' comments and the authors' responses online. We also post the versions of the paper that were used during peer review. These are the versions that the peer review comments apply to.

The versions of the paper that follow are the versions that were submitted during the peer review process. They are not the versions of record or the final published versions. They should not be cited or distributed as the published version of this manuscript.

BMJ Open is an open access journal and the full, final, typeset and author-corrected version of record of the manuscript is available on our site with no access controls, subscription charges or pay-per-view fees (<http://bmjopen.bmj.com>).

If you have any questions on BMJ Open's open peer review process please email [info.bmjopen@bmj.com](mailto:info.bmjopen@bmj.com)

# BMJ Open

## Multi-centre Evaluation of Renal Impairment in Thoracic Surgery (MERITS)

|                               |                                                                                                                                                                                                                                                                                                                                                                                                 |
|-------------------------------|-------------------------------------------------------------------------------------------------------------------------------------------------------------------------------------------------------------------------------------------------------------------------------------------------------------------------------------------------------------------------------------------------|
| Journal:                      | <i>BMJ Open</i>                                                                                                                                                                                                                                                                                                                                                                                 |
| Manuscript ID                 | bmjopen-2021-058542                                                                                                                                                                                                                                                                                                                                                                             |
| Article Type:                 | Original research                                                                                                                                                                                                                                                                                                                                                                               |
| Date Submitted by the Author: | 17-Nov-2021                                                                                                                                                                                                                                                                                                                                                                                     |
| Complete List of Authors:     | Naruka, Vinci; Royal Papworth Hospital NHS Foundation Trust, Department of Cardiothoracic Surgery<br>McKie, Mikel; Papworth Hospital NHS Foundation Trust, Clinical Trials Unit; MRC Biostatistics Unit<br>Ahmadi, Navid; Royal Papworth Hospital NHS Foundation Trust<br>Coonar, Aman; Papworth Hospital NHS Foundation Trust, Thoracic Surgery<br>Collaborators, MERITS; MERITS Collaborators |
| Keywords:                     | Thoracic surgery < SURGERY, AUDIT, Acute renal failure < NEPHROLOGY                                                                                                                                                                                                                                                                                                                             |
|                               |                                                                                                                                                                                                                                                                                                                                                                                                 |

SCHOLARONE™  
Manuscripts

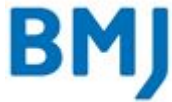

I, the Submitting Author has the right to grant and does grant on behalf of all authors of the Work (as defined in the below author licence), an exclusive licence and/or a non-exclusive licence for contributions from authors who are: i) UK Crown employees; ii) where BMJ has agreed a CC-BY licence shall apply, and/or iii) in accordance with the terms applicable for US Federal Government officers or employees acting as part of their official duties; on a worldwide, perpetual, irrevocable, royalty-free basis to BMJ Publishing Group Ltd ("BMJ") its licensees and where the relevant Journal is co-owned by BMJ to the co-owners of the Journal, to publish the Work in this journal and any other BMJ products and to exploit all rights, as set out in our [licence](#).

The Submitting Author accepts and understands that any supply made under these terms is made by BMJ to the Submitting Author unless you are acting as an employee on behalf of your employer or a postgraduate student of an affiliated institution which is paying any applicable article publishing charge ("APC") for Open Access articles. Where the Submitting Author wishes to make the Work available on an Open Access basis (and intends to pay the relevant APC), the terms of reuse of such Open Access shall be governed by a Creative Commons licence – details of these licences and which [Creative Commons](#) licence will apply to this Work are set out in our licence referred to above.

Other than as permitted in any relevant BMJ Author's Self Archiving Policies, I confirm this Work has not been accepted for publication elsewhere, is not being considered for publication elsewhere and does not duplicate material already published. I confirm all authors consent to publication of this Work and authorise the granting of this licence.

## Multi-centre Evaluation of Renal Impairment in Thoracic Surgery (MERITS)

Vinci Naruka (0000-0002-9222-2684), Mikel A Mckie (0000-0002-1711-4034), Navid Ahmadi (0000-0002-0425-2606), Aman S Coonar (0000-0001-7858-3283), The MERITS collaborators<sup>1</sup>

<sup>1</sup> MERITS collaborators named in Appendix 1

Royal Papworth Hospital, Cambridge, CB2 0AY, United Kingdom, Vinci Naruka, Cardiothoracic Surgery trainee,

Department of Cambridge Institute of Public Health, Medical Research Council Biostatistics Unit, University of Cambridge School of Clinical Medicine, Cambridge, CB2 0SR, United Kingdom, Mikel Mckie, Research Associate,

Royal Papworth Hospital, Cambridge, CB2 0AY, United Kingdom, Navid Ahmadi, Junior doctor

Royal Papworth Hospital, Cambridge, CB2 0AY, United Kingdom, Consultant Thoracic Surgeon.

Correspondence to:

Mr Vinci Naruka, Department of Cardiothoracic Surgery, Royal Papworth Hospital, Cambridge University Health Partners,

e-mail: [vinci.naruka@nhs.net](mailto:vinci.naruka@nhs.net)

### **Contributors and guarantor information:**

MERITS collaborators named in Appendix 1

Writing committee: Vinci Naruka has been involved in conceptualisation, design, methodology, data curation, project administration, validation, writing and reviewing the manuscript, Mikel A Mckie has been involved in data curation, formal analysis, methodology, validation, writing and reviewing the manuscript, Navid Ahmadi has been involved in project administration, writing and reviewing the manuscript, Aman S Coonar has been involved in conceptualisation, design, methodology, data curation, project administration, validation, supervision, writing and reviewing the manuscript.

Steering committee: involved in validation and reviewing the manuscript.

Thoracic Centre Principal Investigators from each centre held responsibility over data collection and validation.

Local coordinators and collaborators were involved in data collection.

The corresponding author attests that all listed authors meet authorship criteria and that no others meeting the criteria have been omitted.

### **Copyright/ licence for publication**

The Corresponding Author has the right to grant on behalf of all authors and does grant on behalf of all authors, a worldwide licence to the Publishers and its licensees in perpetuity, in all forms, formats and media (whether known now or created in the future), to i) publish, reproduce, distribute, display and store the Contribution, ii) translate the Contribution into other languages, create adaptations, reprints, include within collections and create summaries, extracts and/or, abstracts of the Contribution, iii) create any other derivative work(s) based on the Contribution, iv) to exploit all subsidiary rights in the Contribution, v) the inclusion of electronic links from the Contribution to third party material where-ever it may be located; and, vi) licence any third party to do any or all of the above.

### **Competing interest:**

No Competing interests: All authors have completed the ICMJE uniform disclosure form at [www.icmje.org/disclosure-of-interest/](http://www.icmje.org/disclosure-of-interest/) and declare no support from any organisation for the submitted work; no financial relationships with any organisations that might have an interest in the submitted work in the previous three years; no other relationships or activities that could appear to have influenced the submitted work.

### **Ethical Approval:**

The project was approved by the Clinical Audit and Effectiveness Department at the study centre which was Royal Papworth Hospital, Cambridge (Registration Number: 1702) with a waiver for the need for patient consent and was approved as a multi-centre audit. This study was then registered as a clinical audit at each of

1  
2  
3 the collaborating hospitals. This study was supported by the Royal Papworth Hospital Research & Development  
4 Department and by SCTS STUDENTS, the student wing of the Society for Cardiothoracic Surgery in Great  
5 Britain & Ireland and the UK & Ireland Thoracic Surgery Forum  
6  
7

8 **Transparency Statement:**

9 The lead authors (VN and ASC) affirm that the manuscript is an honest, accurate, and transparent account of the  
10 study being reported; that no important aspects of the study have been omitted; and that any discrepancies from  
11 the study as planned (and, if relevant, registered) have been explained.  
12

13 **Role of the funding source:**

14 Statistical support was provided from the MRC Biostatistics Unit Cambridge through the Papworth Trials Unit  
15 Collaboration. No additional funds were used, and the work was done on a voluntary basis by all the  
16 collaborators.  
17

18 **Patient and Public Involvement statement:**

19 No patients were involved in setting the research question or the outcome measures, nor were they involved in  
20 developing plans for design or implementation of the study. No patients were asked to advise on interpretation  
21 or writing up of results. No plans have been made to disseminate the results of the research to study participants.  
22

23  
24 Word count: 2996  
25  
26  
27  
28  
29  
30

31 **KEYWORDS:**

32 Acute Kidney Injury (AKI), Renal Impairment, Quality Improvement, Audit, Multicentre, Mortality, Length of  
33 stay, Thoracic Surgery.  
34  
35  
36  
37  
38  
39  
40  
41  
42  
43  
44  
45  
46  
47  
48  
49  
50  
51  
52  
53  
54  
55  
56  
57  
58  
59  
60

**What is already known about the topic?**

- Acute Kidney Injury (AKI) is poorly documented and little studied in thoracic surgery, but has been extensively explored in other surgical fields in particular cardiac surgery
- Unit-based mortality in thoracic surgery is very low which limits its use as a comparative performance measure and thus drive quality improvement.
- There is a need to identify and validate additional outcome measures which can be easily measured and are associated with meaningful health and system outcomes. This study aims to assess AKI as such a performance measure.

**What this study adds?**

- MERITS is one of the largest studies ever conducted in acute kidney injury and thoracic surgery worldwide.
- Following thoracic surgery, there was significant variation of AKI incidence between units (3.1% - 16.1%).
- AKI is associated with prolonged hospital stay and higher 30-day, 90-day and 1-year mortality after thoracic surgery.
- We propose that AKI should be considered as a suitable comparative and absolute quality measure in thoracic surgery. Reducing rates of AKI may bring about important improvements in patient outcomes and reduce costs. This will have wider healthcare system benefits.

## ABSTRACT

**Objectives-** To measure the unit-level variation in AKI incidence post-thoracic surgery over a contemporary 1-year period. Secondary aims include examining the associations with sex, age, operation type, length of stay and mortality.

**Design-** A multi-centre, observational, retrospective study in thoracic surgery.

**Setting-** 17 of 35 UK thoracic surgery units participated. SCTS STUDENTS supported data collection.

**Participants-** Overall, 15229 patients were collected of which 15154 were included for analysis after exclusions. All patients (age $\geq$ 18 years) undergoing any thoracic surgery from 01.04.2016 to 31.3.2017 were included. For analysis, we excluded patients with pre-operative end-stage renal failure and those with incomplete data.

**Main Outcome measures-** The primary outcome is the incidence of AKI within 7 days of the procedure or discharge date if earlier. Secondary outcomes include assessing associations with patient demographics (age, sex), type of procedure (open and minimally invasive), length of stay and mortality.

**Results-** 17 of 35 UK centres provided data on 15154 patients. AKI was diagnosed in 1090 patients (7.2%) within 7 days of surgery with AKI stage 1 (4.8%), stage 2 (1.7%) and stage 3 (0.7%). There was a statistically significant variation in AKI incidence between units from 3.1 to 16.1% ( $p<0.05$ ). Significant differences between non-AKI and AKI were found in post-operative length of stay (3 vs 7 days,  $p<0.001$ ), 30-day mortality (1.6 vs 9%,  $p<0.001$ ), 90-day mortality (4.4 v 14.7%,  $p<0.001$ ) and 1-year mortality (12.2 vs 23.1%,  $p<0.001$ ).

**Conclusions-** Following thoracic surgery, AKI incidence ranged from 3.1% to 16.1% between units ( $p<0.05$ ) with associations between AKI and both length of stay and mortality. We propose AKI as a suitable comparative and absolute quality measure in thoracic surgery. Reducing rates of AKI may improve patient outcomes, length of stay and reduce costs.

### Strengths and limitations of this study

- MERITS is one of the largest studies ever conducted in acute kidney injury and thoracic surgery worldwide
- it is one of the largest collaborations of thoracic surgical units in the UK and was achieved without any extra funding. This was only possible because of a strong collaborative culture including students recruited from SCTS STUDENTS.
- The success of the project also relied on collecting simple, robust and pragmatic data variables that were previously identified in the pilot study.
- The observational design of this multi-centre study precludes conclusions regarding causal links between AKI and the outcomes.
- The study did not collect co-morbidities that have been previously associated with AKI as this was not the intent of the study objectives and design. This could be addressed in a future study.

## MANUSCRIPT

### INTRODUCTION

To achieve the best patient outcomes after surgery and drive quality improvement, suitable outcome measures are needed. Traditionally, mortality has been used, but because of improved care, mortality is now very low in thoracic surgery. The 2019 lung cancer clinical outcomes project (LCCOP) report (for operations in 2017) gave survival rates of 98.1% at 30 days and 88.7% at 1-year post-surgery for primary lung cancer in NHS England.<sup>1</sup> There were no negative outliers and one positive outlier at 30 days. At one year, there were no outliers. In the SCTS thoracic surgery audit<sup>2</sup> from 1st April 2016- 31st March 2017, 28,740 cases in total were reported to the SCTS from units in the UK and Republic of Ireland. The overall in-hospital unadjusted mortality rate for this period was 1.16% (334 deaths/28,740 cases). This is reassuring for patients and clinicians. However, when an outcome has little variation, it means that there are limitations in using it to compare performance.

As a result, there is a need to identify and validate additional outcome measures. Such a metric should be easy to reliably measure, be associated with meaningful health and system outcomes and show sufficient variation. This study aims to assess acute kidney injury (AKI) as such a performance measure.

Acute Kidney Injury (AKI) is not well documented in thoracic surgery. Only three relevant publications report an incidence of AKI post-thoracic surgery: 5.9% after all lung resections,<sup>3</sup> and 6.8% and 10% after lung cancer resections.<sup>4,5</sup> AKI is well recognised after cardiac surgery and is associated with worse morbidity, mortality and more costs.<sup>6-9</sup> AKI has been studied in other surgical fields with rates from 6-12% in gastrointestinal surgery and 23-25% in vascular surgery.<sup>10</sup>

Our previous single-centre pilot study found an incidence of AKI post-thoracic surgery of 15.1% (86/568).<sup>11</sup> AKI was also associated with a longer hospital stay. However, in order to explore variation, a single centre study is not sufficient. Having wider, multi-centre estimates of incidence and baseline characteristics of AKI after thoracic surgery would allow benchmarking and quality improvement and standards to guide practice. In order to better understand AKI in thoracic surgery, we developed this project: "Multicentre Evaluation of Renal Impairment in Thoracic Surgery" (MERITS).

In this study, which we now report, we observed significant variation of AKI incidence across the participating centres and found that AKI was associated with increased length of stay and mortality.

The primary aim was to determine the unit-level variation in the incidence of AKI post thoracic surgery over a contemporary 1-year period. Secondary aims were to report the associations with sex, age, operation type, length of stay and mortality.

### METHODS

#### Study design

MERITS is a multi-centre, observational, retrospective study in thoracic surgery, composed of a collaboration of 17 thoracic surgery centres participating in the SCTS thoracic surgery national rolling audit.

All 35 hospitals in the UK and Ireland that offer adult thoracic surgery and report to the SCTS thoracic surgery audit were invited. Seventeen units participated. Each participating thoracic surgery unit team comprised a consultant thoracic surgeon lead, a day-to-day coordinator (usually a middle-grade doctor or a research nurse), and a group of medical students recruited by SCTS STUDENTS.

#### Inclusion and Exclusion criteria:

All patients (age  $\geq$  18 years) undergoing any thoracic surgery from 1<sup>st</sup> April-2016 to 31<sup>st</sup> March-2017 (date of 1<sup>st</sup> surgery within these dates) were included. For analysis, we excluded patients with pre-operative end-stage renal failure and those with incomplete data.

#### Variables:



Our previous pilot study<sup>11</sup> had led us to select variables which appeared to be both pragmatic to collect, robust and clinically meaningful. These were: submitted SCTS thoracic surgery operation code; dates of birth, operation, discharge, death (if applicable); sex; AKI stage (1, 2 or 3); peak creatinine; pre and post-operative renal replacement therapy. Thoracic surgery operations were recorded using the nationally accepted SCTS code for 2016/17 (Supplementary file 1). Survival was collected for 1-year post-surgery.

To accurately collect renal function data, each thoracic unit contacted their respective biochemistry department and extracted the AKI stage and peak creatinine up to 7 days from the operation or discharge date if earlier. AKI stage was calculated using the algorithm introduced by the NHS England Patient Safety Alert to standardise AKI identification.<sup>12</sup> In 3 of 17 units, creatinine was collected manually, and the AKI staging was calculated following the same algorithm.

Our pilot study<sup>11</sup> found that urine volumes were not collected or recorded reliably; therefore, we did not collect this in MERITS. In modern thoracic surgery practice within our nations, urinary catheterisation and strict urine volume recording is not commonly performed, and so urine output is not a robust measure.

#### Outcome measures

The primary outcome is the incidence of AKI occurring within 7 days of the procedure or discharge date if earlier. Secondary outcomes include assessing associations with patient demographics (age, sex), type of procedure (open and minimally invasive), length of stay and mortality.

#### Data quality, security and validation:

The majority of data collectors were medical students who were recruited by SCTS STUDENTS and junior doctors. All participants were provided with an online training package as part of the local site set-up. They were supervised by a day-to-day coordinator (ranging from a middle-grade cardiothoracic surgeon to a research nurse) and a consultant surgeon. Data was entered locally onto a spreadsheet with each team securely retaining a non-anonymised version. A secure anonymised version was sent to the MERITS study centre. Validation with each centre was performed before analysis. Digital security followed GDPR guidelines.

Data were validated by two observers who were not involved in the original data collection. Individual unit analysis was shared with each unit lead for checking and approval.

#### Data collection period:

The launch for MERITS was in March 2018 at the SCTS Annual Meeting in Glasgow. This was followed by local regulatory approvals. Site opening and the recruitment of students and other data collectors took place during Summer 2018. All participants were provided with site packs with access to key documents for the study design, including on-line training videos.<sup>13</sup>

#### Statistical analysis:

Continuous variables were summarised with the following descriptive statistics, non-missing sample size, mean and 95% and 99.8% confidence intervals or medians with interquartile range (IQR) where appropriate. Categorical data such as AKI incidence was summarised using frequencies and percentages calculated using the non-missing sample size. Univariate hypothesis testing was undertaken by Mann Whitney U tests for continuous data and Chi-squared for categorical data.

Multivariate analysis was also undertaken using generalised linear mixed modelling (GLMM) to assess the associations between AKI incidence and the fixed effects of our covariates plus random variation in intercept among centres. Our fixed effects include age group (Young/Old/Oldest), sex (M/F) and operation type (Open/VATs/Endoscopic). All centres were included as random effect intercepts with a fixed gradient. Model fit was assessed by the Hosmer-Lemeshow goodness of fit test, by computing receiver operating characteristics and Nakagawa's pseudo  $r^2$  for mixed effect models. The associations of the fixed effects were estimated and reported as odds ratios with 95% confidence intervals. The conditional modes of the random effect intercepts and their 95% confidence intervals were also derived to assess centre specific variation in isolation from fixed effects.

#### Ethics, approval and dissemination:

The project was approved by the Clinical Audit and Effectiveness Department at the study centre which was Royal Papworth Hospital, Cambridge (Registration Number: 1702). with a waiver for the need for patient consent and was approved as a multi-centre audit. This study was then registered as a clinical audit at each of the collaborating hospitals. The protocol and invitation to participate was disseminated widely through local and national student networks and societies in the UK and Ireland.

#### Patient and Public involvement

No patients were involved in setting the research question or the outcome measures, nor were they involved in developing plans for design or implementation of the study. No patients were asked to advise on interpretation or writing up of results. No plans have been made to disseminate the results of the research to study participants.

## **RESULTS**

### Subjects

Overall, 15229 patients were collected of which 15154 were included for analysis after exclusions (Figure 1). These were from 17 out of 35 thoracic surgical units in the UK. Unit operative volumes ranged from 304 to 2,416 patients per year. The total number of thoracic surgery operations submitted to SCTS in 2016-17 was 28740. This study represented 52.7% of all operations reported.

Table 1 shows the sex, age groups, whether open, VATS or endoscopic and SCTS operation code category are shown along with the proportion with and without AKI.

### Demographics

8809 (58.1%) patients were male and 6345 (41.9%) were female. Average age at operation was  $60.72 \pm 16.76$  years. Age was divided into 3 categories; 5958 (39.3%) were <60 years, 8197 (54.1%) was 60-79 years and 998 (6.6%) were  $\geq 80$  years. One patient's age was not reliably confirmed.

### Minimally invasive versus open surgery

The breakdown of operations as completed was as follows: 5835 (38.5%) operations were open, 7635 (50.4%) were minimally invasive video-assisted thoracic surgery (VATS), 1684 (11.1%) were endoscopic (such as bronchoscopy). 20 cases were reported as robotic and were included with the minimally invasive VATS group.

### SCTS operation code category

The breakdown of operations is shown in Table 1. The largest categories were lung resections for primary lung cancer (category A, 4502 cases, 29.8%), pleural diseases (category D, 3311 cases, 21.8%) and lung resections for reasons other than lung cancer (category B, 1930 cases, 12.8%). All lung resections (categories A and B) accounted for 42.6% of the workload.

### Characteristics of AKI

#### Incidence of AKI

Of 15154 patients, 1090 (7.2%) were found to have developed AKI within 7 days post-thoracic surgery: stage 1 (n= 731; 4.8%); stage 2 (n=255; 1.7%); and stage 3 (n=104; 0.7%). AKI incidence ranged between 3.1% to 16.1%. The units have been listed in rank order from 1 to 17 (with 1 being the lowest rate of AKI and 17 the highest). This is shown numerically in Table 2 and Forest plot Figure 2.

#### AKI rate in open and minimally invasive surgery

Patients who had open surgery had a higher rate of AKI as compared to those who had VATS (Table 1). Of those that did not develop AKI, 37.4% of patients had open surgery, 51.1% had VATS and 11.5% had an endoscopy. Of those that did develop AKI, 52.8% of patients had open surgery, 41.7% had VATS and 5.5% had an endoscopy.

### Adjusted AKI variation across units

To assess centre variation and associations more accurately between our covariates and AKI incidence we undertook a multivariate analysis. Using the GLMM framework, we adjusted our observed clinically relevant variables by defining our fixed effects terms as age group, sex and operation type with each centre represented by a random effect intercept with a fixed gradient.

All fixed effects showed a significant relationship with developing AKI post operatively. Male patients had a 1.37x (CI 95% 1.21-1.57;  $P < 0.001$ ) increased odds of developing AKI. Patients between the age of 60-79 had a 1.99x (CI 95% 1.72-2.30;  $P < 0.001$ ) increased odds of developing AKI; and above 80 had a 3.01x (CI 95% 2.4-3.8;  $P < 0.001$ ) increased odds of developing AKI. There was a 1.7x (CI 95% 1.48-1.94;  $P < 0.001$ ) increased odds of developing AKI with open procedures compared to VATS (Table 3).

We then derived the conditional mode of the random intercepts for each centre to assess the adjusted centre to centre variation (Figure 3). We found that there was significant variation in 64.7% (11/17) of the sampled centres after adjusting for our observed covariates. This suggests that there was significant variation across the centres.

Model diagnostics showed no evidence of lack of fit (HL test,  $p = 0.32$ ), and a reasonable level of discrimination with a c-statistic of 0.71. However, our model did not explain much of the variability in the data (Conditional pseudo  $r^2 = 0.15$ ), meaning there are likely unobserved explanatory covariates.

### Length of stay

Patients with AKI (as compared to those without) had an increased median postoperative length of stay of 4 days as compared to non-AKI (7 v 3 days;  $p < 0.001$ ) (Table 4).

The total increase in length of stay accounts for 4360 days across the 1090 AKI-positive patients or 5.1% (4360/86054) of the total number of days spent in the hospital after thoracic surgery in our study population.

### Mortality

Patients with AKI (as compared to those without) had a significantly increased mortality at 30-days (AKI 9% vs no AKI 1.6%;  $p < 0.001$ ); 90 day (14.7% v 4.4%) and 1 year (23.1 vs 12.2%;  $p < 0.001$ ) (Table 4).

Across centres, we found that mortality varied between 0.3%-5.1% at 30 days, 2.0%-9.6% at 90 days and 3.2%-19.0% at 1 year (Figure 4 a-c). Interestingly, we observed that the ranking of AKI differed from the ranking of mortality. For instance, the unit with the highest rate of AKI, did not have the highest level of mortality.

## **DISCUSSION**

MERITS is the largest study to examine AKI after thoracic surgery and one of the largest such studies in a surgical population.<sup>3-5</sup> Previous single centre studies showed AKI rates that varied from 5.9% after all lung resections<sup>3</sup> to 6.8% and 10% after lung cancer resections.<sup>4,5</sup> Our earlier single-centre pilot study incorporating all procedures found a rate of 15.1%.<sup>11</sup>

The primary aim was to examine the variation in AKI incidence between units. This study of 17 units in the UK found an overall AKI rate of 7.2% with a range from 3.1% to 16.1%. The spread was statistically significant. We have also shown that the post-thoracic surgery AKI variation was greater than the postoperative death rate reported in a similar period. In the 2019 LCCOP report, the overall in-hospital mortality was 1.26% (334 of 26460 patients) with 1 positive outlier at 30 days and no outliers at 1 year. We have shown that AKI has a greater variation in incidence than the death rate. In this study after adjustment, there are 5 positive and 6 negative statistical outliers (Figure 3), which would support the use of AKI as a performance metric.

This study showed the variation in AKI between units is greater than the variation in mortality. However, there was not a consistent relationship between AKI and mortality. For example, the unit with the highest rate of AKI (unit 17 in Table 1 and Figure 2 and 3) had a much lower mortality rate. The explanation for this is not obvious, and it is likely multifactorial. One explanation is that in that unit post-operative steps effectively treat AKI though do not prevent its occurrence as compared to other units. Examining the case-mix and different practices

1  
2  
3 between units will be the start of exploring the reasons for this difference and this can drive quality  
4 improvement.  
5

6 We went on to demonstrate a statistically significant association between AKI and length of stay and mortality.  
7 There are many studies in different clinical situations which observe similar findings. It is recognised that AKI  
8 is an independent predictor of death<sup>14</sup> even with mild transient AKI post-surgery.<sup>15</sup> Patients who develop AKI  
9 are at increased risk of chronic kidney disease and end-stage renal failure.<sup>16</sup>

10 Because AKI is sometimes preventable and reducing its rate is associated with better outcomes, there are  
11 important potential health and economic benefits of monitoring and reducing AKI rates.<sup>17</sup> There is a national  
12 programme in the UK to increase AKI awareness and to prevent and treat it.  
13

14 The relationship between AKI and longer stay is also intuitively clear. In this study, the associated unadjusted  
15 median increase in bed occupancy is 5.1%, corresponding to 4360 days. While there will be various  
16 contributory factors, it follows that reducing postoperative AKI is also likely to reduce the length of stay.  
17

18 We found that increased age and male sex were also associated with an increased risk of AKI. Various reasons  
19 can be speculated. Renal function declines with age and the nephrotoxic impact of surgery and anaesthesia may  
20 be greater. Perioperative hypotension for example may be less well tolerated.  
21

22 Importantly, we found that open surgery is associated with a significantly greater risk of AKI than minimally  
23 invasive surgery. The reasons for this may be related to the greater tissue injury associated with an open  
24 operation, but there could also be other factors such as complexity and length of the surgery. We speculate that  
25 the latter is more likely and this is another area to be explored.  
26

27 This study has several strengths. MERITS is one of the largest studies ever conducted in acute kidney injury and  
28 thoracic surgery worldwide. Furthermore, it is one of the largest collaborations of thoracic surgical units in the  
29 UK and was achieved without any extra funding. This was only possible because of a strong collaborative  
30 culture including students recruited from SCTS STUDENTS. The success of the project also relied on collecting  
31 simple, robust and pragmatic data variables that were previously identified in the pilot study.

32 This study has some limitations. The observational design of this multi-centre study precludes conclusions  
33 regarding causal links between AKI and the outcomes. AKI was diagnosed based on renal function only as urine  
34 output data could not be collected reliably. The study did not collect co-morbidities that have been previously  
35 associated with AKI as this was not the intent of the study objectives and design. This could be addressed in a  
36 future study.  
37

38 In summary, we have identified a significant variation in AKI rates post thoracic surgery. This variation  
39 between units will be due to multiple factors and reflect different surgical and anaesthetic strategies as well as  
40 patient heterogeneity. This is likely to include different approaches to perioperative cardiac output control, fluid  
41 management and use of nephrotoxic agents. Historically patients undergoing thoracic surgery were often  
42 relatively dehydrated on the basis that this may reduce the rate of acute lung injury associated with positive-  
43 pressure ventilation and surgical trauma. This is different to some of the concepts of enhanced recovery which  
44 encourage hydration and euvolaemia. It would be useful to consider the approach of the better performing units  
45 to determine what practices could be disseminated in line with the quality improvement strategy of the NHS.<sup>18</sup>  
46  
47  
48  
49  
50  
51  
52  
53  
54  
55  
56  
57  
58  
59  
60

## TABLES

Table 1. Age, sex, operation mode and SCTS code and proportion with AKI

|                                    | level  | Overall     | AKI Negative | AKI Positive |
|------------------------------------|--------|-------------|--------------|--------------|
| n                                  |        | 15154       | 14064        | 1090         |
| Gender n (%)                       | F      | 6345 (41.9) | 5967 (42.4)  | 378 (34.7)   |
|                                    | M      | 8809 (58.1) | 8097 (57.6)  | 712 (65.3)   |
| Age group n (%)                    | Young  | 5958 (39.3) | 5686 (40.4)  | 272 (25.0)   |
|                                    | Old    | 8197 (54.1) | 7500 (53.3)  | 697 (63.9)   |
|                                    | Oldest | 998 (6.6)   | 877 (6.2)    | 121 (11.1)   |
| Operation access mode n (%)        | OPEN   | 5835 (38.5) | 5260 (37.4)  | 575 (52.8)   |
|                                    | VATS   | 7635 (50.4) | 7180 (51.1)  | 455 (41.7)   |
|                                    | ENDO   | 1684 (11.1) | 1624 (11.5)  | 60 (5.5)     |
| SCTS operation code category n (%) | A      | 4502 (29.8) | 4052 (28.9)  | 450 (41.5)   |
|                                    | B      | 1930 (12.8) | 1812 (12.9)  | 118 (10.9)   |
|                                    | C      | 452 (3.0)   | 416 (3.0)    | 36 (3.3)     |
|                                    | D      | 3311 (21.9) | 3084 (22.0)  | 227 (20.9)   |
|                                    | E      | 734 (4.9)   | 693 (4.9)    | 41 (3.8)     |
|                                    | F      | 1484 (9.8)  | 1433 (10.2)  | 51 (4.7)     |
|                                    | G      | 50 (0.3)    | 41 (0.3)     | 9 (0.8)      |
|                                    | H      | 13 (0.1)    | 12 (0.1)     | 1 (0.1)      |
|                                    | I      | 939 (6.2)   | 847 (6.0)    | 92 (8.5)     |
|                                    | Z      | 1684 (11.2) | 1624 (11.6)  | 60 (5.5)     |

Table 2. AKI incidence (%) by unit in rank order

| Anonymised Centre ID | Centre Size | AKI Negative | AKI Positive |
|----------------------|-------------|--------------|--------------|
| 1                    | 1233        | 1195 (96.9)  | 38 (3.1)     |
| 2                    | 1267        | 1227 (96.8)  | 40 (3.2)     |
| 3                    | 1037        | 1003 (96.7)  | 34 (3.3)     |
| 4                    | 497         | 480 (96.6)   | 17 (3.4)     |
| 5                    | 716         | 691 (96.5)   | 25 (3.5)     |
| 6                    | 615         | 587 (95.4)   | 28 (4.6)     |
| 7                    | 1341        | 1265 (94.3)  | 76 (5.7)     |
| 8                    | 513         | 482 (94.0)   | 31 (6.0)     |
| 9                    | 716         | 668 (93.3)   | 48 (6.7)     |
| 10                   | 1413        | 1308 (92.6)  | 105 (7.4)    |
| 11                   | 458         | 423 (92.4)   | 35 (7.6)     |
| 12                   | 518         | 473 (91.3)   | 45 (8.7)     |
| 13                   | 645         | 586 (90.9)   | 59 (9.1)     |
| 14                   | 2384        | 2122 (89.0)  | 262 (11.0)   |
| 15                   | 922         | 807 (87.5)   | 115 (12.5)   |
| 16                   | 301         | 262 (87.0)   | 39 (13.0)    |
| 17                   | 578         | 485 (83.9)   | 93 (16.1)    |

Table 3. AKI modelling for gender, age and operation type.

|                |             | 95% confidence intervals |             |             |         |
|----------------|-------------|--------------------------|-------------|-------------|---------|
|                |             | Odds ratio               | Lower bound | Upper bound | P value |
|                | (Intercept) | 0.03                     | 0.02        | 0.04        | <0.001  |
| Gender         | Female      | 1.00                     | Reference   |             |         |
|                | Male        | 1.37                     | 1.20        | 1.57        | <0.001  |
| Age            | Youngest    | 1.00                     | Reference   |             |         |
|                | Old         | 1.99                     | 1.72        | 2.30        | <0.001  |
|                | Oldest      | 3.02                     | 2.40        | 3.80        | <0.001  |
| Operation Type | VATS        | 1.00                     | Reference   |             |         |
|                | OPEN        | 1.70                     | 1.48        | 1.94        | <0.001  |
|                | Endoscopy   | 0.54                     | 0.41        | 0.71        | <0.001  |

Table 4. Associations between AKI and mortality and length of stay

|                               | Level    | AKI Negative      | AKI Positive       | p      |
|-------------------------------|----------|-------------------|--------------------|--------|
| N                             |          | 14064             | 1090               |        |
| 30 day Mortality (%)          | Survived | 13846 (98.4)      | 992 (91.0)         | <0.001 |
|                               | Died     | 218 (1.6)         | 98 (9.0)           |        |
| 90 Day mortality (%)          | Survived | 13451 (95.6)      | 930 (85.3)         | <0.001 |
|                               | Died     | 613 (4.4)         | 160 (14.7)         |        |
| 365 Day Mortality (%)         | Survived | 12354 (87.8)      | 838 (76.9)         | <0.001 |
|                               | Died     | 1710 (12.2)       | 252 (23.1)         |        |
| Length of stay (median [IQR]) |          | 3.00 [2.00, 6.00] | 7.00 [4.00, 13.00] | <0.001 |



**FIGURES**

Figure 1. Flow chart of inclusion and exclusion of patients.

Figure 2. Unadjusted Forest Plot for AKI incidence amongst different units.

Point ranges report the AKI proportion of that centre and the associated 95% confidence interval. The solid horizontal line is the mean AKI incidence across all centres and the dashed lines represent the associated 95% and 99.8% confidence intervals.

Figure 3. Adjusted Forest Plot for AKI incidence amongst different units.

Point ranges represent the estimated conditional mode of the random intercept associated with each centre with the associated 95% confidence intervals. Brown points represent centres that deviate significantly from average and black points represent non-significant centres.

Figure 4a-c: Unadjusted Forest plot for 30-day, 90 day and 1 year mortality among different units. Point ranges report the proportion of mortality of that centre and the associated 95% confidence interval. The solid horizontal line is the mean mortality across all centres and the dashed lines represent the associated 95% and 99.8% confidence intervals.

## REFERENCES

1. LCCOP 2019 Report | Society for Cardiothoracic Surgery [Internet]. [cited 2021 Mar 11]. Available from: <https://scts.org/lccop-2019-report/>
2. Personal communication. D.West. SCTS Thoracic Surgery Audit Lead. 8th March 2021.
3. Ishikawa S, Griesdale DEG, Lohser J. Acute kidney injury after lung resection surgery: incidence and perioperative risk factors. *Anesth Analg*. 2012 Jun;**114**(6):1256–62.
4. Licker M, Cartier V, Robert J, Diaper J, Villiger Y, Tschopp J-M, et al. Risk Factors of Acute Kidney Injury According to RIFLE Criteria After Lung Cancer Surgery. *Ann Thorac Surg*. 2011 Mar 1;**91**(3):844–50.
5. Cardinale D, Cosentino N, Moltrasio M, Sandri MT, Petrella F, Colombo A, et al. Acute kidney injury after lung cancer surgery: Incidence and clinical relevance, predictors, and role of N-terminal pro B-type natriuretic peptide. *Lung Cancer*. 2018 Sep 1;**123**:155–9.
6. Loef BG, Epema AH, Smilde TD, Henning RH, Ebels T, Navis G, et al. Immediate Postoperative Renal Function Deterioration in Cardiac Surgical Patients Predicts In-Hospital Mortality and Long-Term Survival. *J Am Soc Nephrol*. 2005 Jan 1;**16**(1):195–200.
7. Lopez-Delgado JC, Esteve F, Torrado H, Rodríguez-Castro D, Carrio ML, Farrero E, et al. Influence of acute kidney injury on short- and long-term outcomes in patients undergoing cardiac surgery: risk factors and prognostic value of a modified RIFLE classification. *Crit Care*. 2013 Dec 13;**17**(6):R293.
8. Vives M, Wijeyesundera D, Marczin N, Monedero P, Rao V. Cardiac surgery-associated acute kidney injury. *Interact Cardiovasc Thorac Surg*. 2014 May;**18**(5):637–45.
9. Acute Kidney Injury and Prognosis After Cardiopulmonary Bypass: A Meta-analysis of Cohort Studies - American Journal of Kidney Diseases [Internet]. [cited 2019 Jun 25]. Available from: [https://www.ajkd.org/article/S0272-6386\(14\)01252-9/fulltext](https://www.ajkd.org/article/S0272-6386(14)01252-9/fulltext)
10. Bell S, Davey P, Nathwani D, Marwick C, Vadiveloo T, Sneddon J, et al. Risk of AKI with Gentamicin as Surgical Prophylaxis. *J Am Soc Nephrol*. 2014 Jan 11;**25**(11):2625–32.
11. Naruka V, Mckie MA, Khushiwal R, Clayton J, Aresu G, Peryt A, et al. Acute kidney injury after thoracic surgery: a proposal for a multicentre evaluation (MERITS). *Interact Cardiovasc Thorac Surg*. 2019 Dec 1;**29**(6):861–6.
12. Algorithm for detecting Acute Repeat Kidney Injury (AKI) based on serum creatinine changes with time This algorithm relates to the NHS England patient safety alert: NHS/PSA/D/2014/010 [Internet]. [cited 2019 Jun 25]. Available from: [zotero://attachment/611/](https://www.zotero.org/attachment/611/)
13. MERITS Step by step video for data collection - YouTube [Internet]. [cited 2019 Jun 25]. Available from: [https://www.youtube.com/watch?v=a\\_PVuXU3bP8&feature=youtu.be](https://www.youtube.com/watch?v=a_PVuXU3bP8&feature=youtu.be)
14. Levy EM, Viscoli CM, Horwitz RI. The effect of acute renal failure on mortality. A cohort analysis. *JAMA*. 1996 May 15;**275**(19):1489–94.
15. O'Connor ME, Hewson RW, Kirwan CJ, Ackland GL, Pearse RM, Prowle JR. Acute kidney injury and mortality 1 year after major non-cardiac surgery. *Br J Surg*. 2017 Jun;**104**(7):868–76.
16. Coca SG, Singanamala S, Parikh CR. Chronic kidney disease after acute kidney injury: a systematic review and meta-analysis. *Kidney Int*. 2012 Mar;**81**(5):442–8.
17. Doyle JF, Forni LG. Acute kidney injury: short-term and long-term effects. *Crit Care Lond Engl*. 2016 Jul 4;**20**(1):188.

1  
2  
3  
4  
5  
6  
7  
8  
9  
10  
11  
12  
13  
14  
15  
16  
17  
18  
19  
20  
21  
22  
23  
24  
25  
26  
27  
28  
29  
30  
31  
32  
33  
34  
35  
36  
37  
38  
39  
40  
41  
42  
43  
44  
45  
46  
47  
48  
49  
50  
51  
52  
53  
54  
55  
56  
57  
58  
59  
60

18. Getting It Right First Time - GIRFT [Internet]. Getting It Right First Time - GIRFT. [cited 2021 Mar 11]. Available from: <http://www.gettingitrightfirsttime.co.uk/>

For peer review only

Total Patients (n = 15229)

1  
2  
3  
4  
5  
Patients excluded (n = 75)

Incomplete data (n = 2)

Preoperative renal replacement therapy (n

= 73)

6  
7  
8  
Patients included in analysis  
(n = 15154)

For peer review only - <http://bmjopen.bmj.com/site/about/guidelines.xhtml>

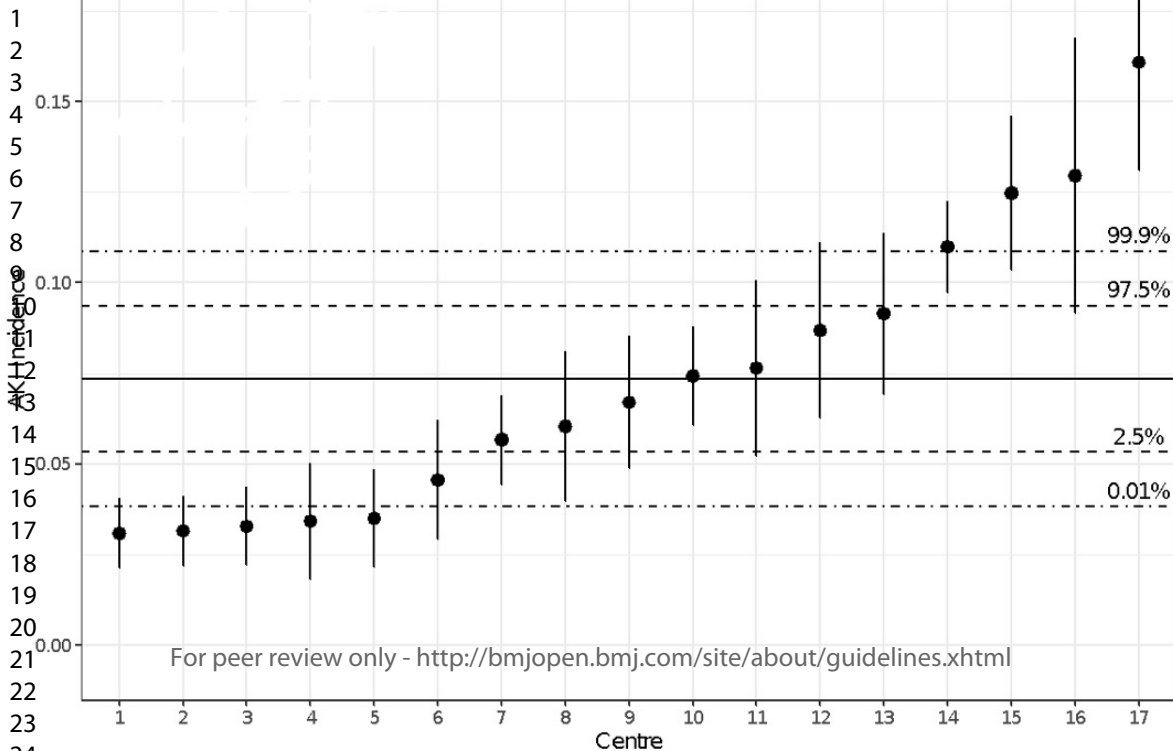

Conditional Estimates of random effects

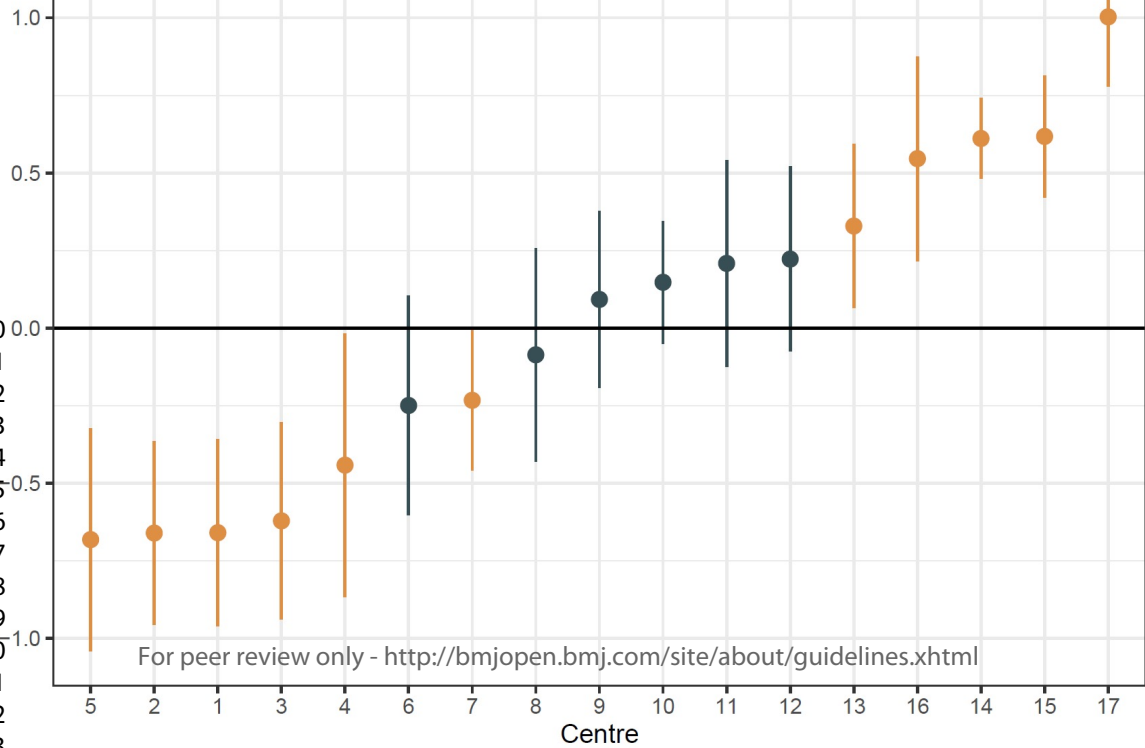

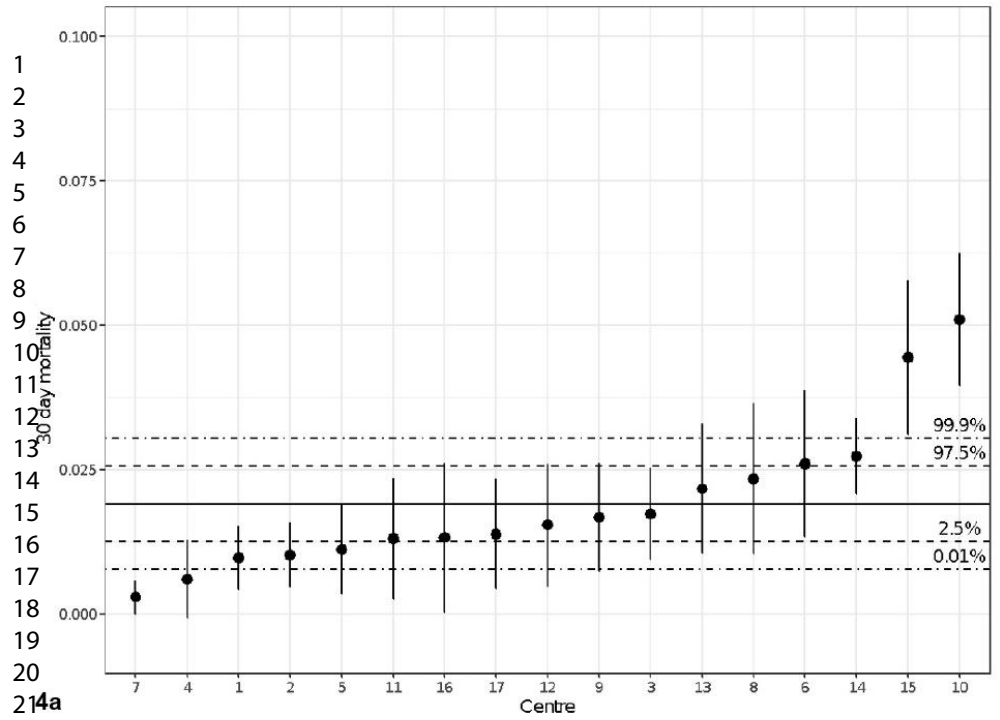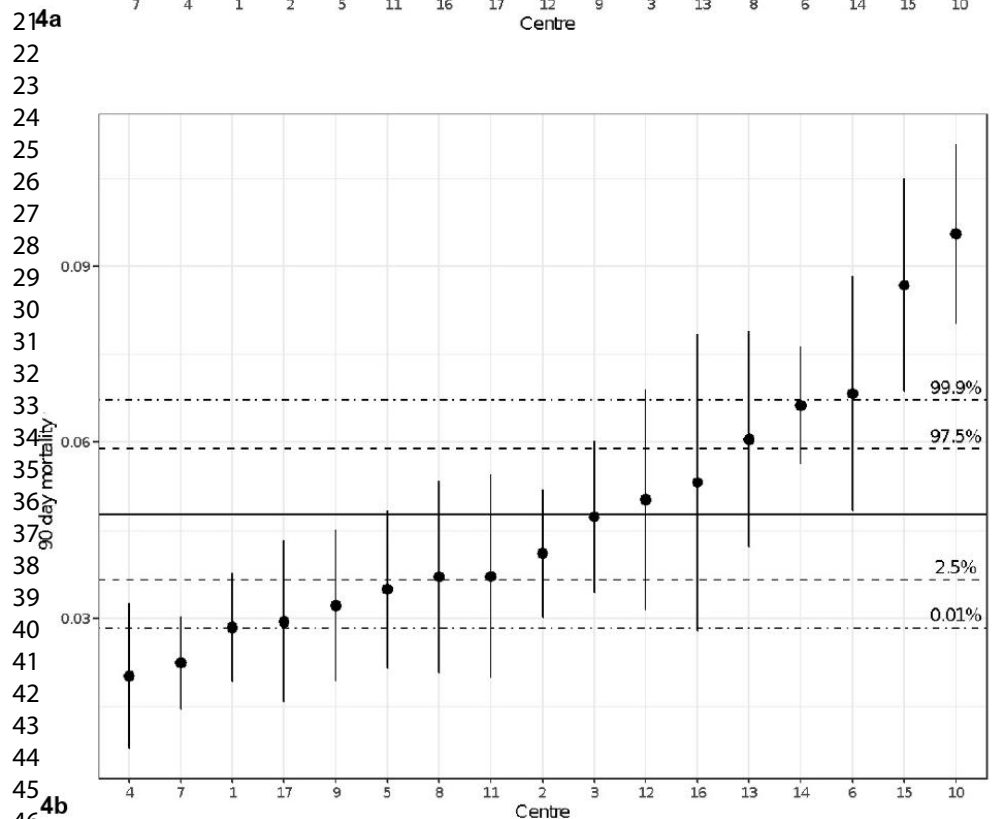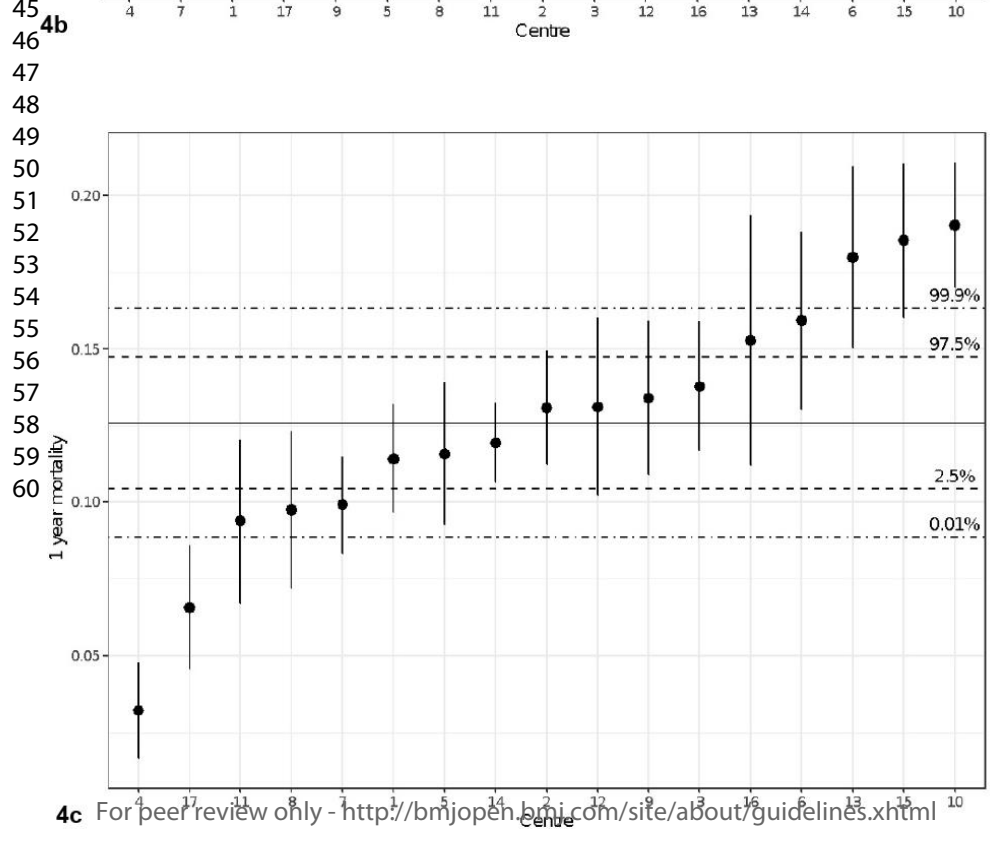

**Writing Committee:** V. Naruka, M.A. Mckie, N. Ahmadi, A.S. Coonar.

**Steering committee:**

G. Aresu, A. Fry, S. Kendall, R. Page, C. Patvardhan, A. Peryt, R. Shah, D. West  
S. Wooley, S. Yung

**Thoracic Centre Principal Investigators:**

S. Stamenkovic (**Barts Health NHS Trust, London**), S. Shah (**Basildon University Hospital, Basildon**), A. Kirk (**Golden Jubilee National Hospital, Glasgow**), M. Loubani (**Hull University Teaching Hospitals NHS Trust, Hull**), J. Dunning (**James Cook University Hospital, Middlesbrough**), N. Chaudhuri and P. Tcherveniakov (**Leeds Teaching Hospitals NHS Trust, Leeds**), K. Rammohan (**Manchester University NHS Foundation Trust, Manchester**), J. Kadlec (**Norfolk and Norwich University Hospitals NHS Foundation Trust, Norfolk and Norwich**), A. Marchbank (**Plymouth Hospitals NHS Trust, Plymouth**), E.K.S Lim (**Royal Brompton and Harefield NHS Foundation Trust, London**), V. Zamvar (**Royal Infirmary of Edinburgh, Edinburgh**), A.S. Coonar (**Royal Papworth Hospital, Cambridge**), C. Tan (**St George's University Hospitals NHS Foundation Trust, London**), M. Hayward (**University College London Hospitals NHS Foundation Trust, London**), M. Kalkat (**University Hospitals Birmingham NHS Foundation Trust, Birmingham**), E. Woo (**University Hospital Southampton NHS Foundation Trust, Southampton**), V. Valtzoglou (**University Hospital of Wales, Cardiff**)

**Local Coordinators (\*) and Collaborators:**

**Barts Health NHS Trust (London):** O. Asemota, C. Evans, M. Lee, E. F. Tan, N. J. Yong;

**Basildon University Hospital (Basildon):** V. Caruso, R. Leatherby;

**Golden Jubilee National Hospital (Glasgow):** E. Allen, H. Ismahel, A. Patra;

**Hull University Teaching Hospitals NHS Trust (Hull):** V. Crispi, A. Fort-Schaale,  
J. Green, E. Isaac\*, J. Walshaw;

**James Cook University Hospital (Middlesbrough):** C. P. Vidanapthirana\*, J. Trevis;

**Leeds Teaching Hospitals NHS Trust (Leeds):** M. Ashraf, M. Jabeen, Z. Syla\*,  
S. Vijayapuri\*;

**Manchester University NHS Foundation Trust (Manchester):** T. Eadington\*, B. Hama, O  
Karadakhy, M. Salehi\*, M. Taylor\*;

**Norfolk and Norwich University Hospitals NHS Foundation Trust (Norfolk and Norwich):**  
M. Dixon, P. Njoku;

**Plymouth Hospitals NHS Trust (Plymouth):** M. Halasa, N. Marshall, V. Palaniappan, L.  
Rogers\*;

**Royal Brompton and Harefield NHS Foundation Trust (London):** S. K. Bains, Y. N. Bashir, A.  
K. Bolina, H. Chavan, L. H. Cheng, J. Donovan\*, A. G. Knighton, S. K. Longani, M. Nizami, P. D.  
Sousa\*, B. A. Taylor, J. J. Teh, S. Zaman;

**Royal Infirmary of Edinburgh (Edinburgh):** L. Clark;



1  
2  
3 **Royal Papworth Hospital (Cambridge):** S. Cernic, H. Garland, A. GuéRoult, V. Naruka\*, B.  
4 Ripoll, S. Saj, M. Tennyson;

5  
6 **St George's University Hospitals NHS Foundation Trust (London):** J. Abreu\*, V. Beynon, M.  
7 Kaur, A. Nogueiro, A. Patel, V. Rohilla, N. Sahdev\*, M. Sing, A. Sinha, J. Smelt\*, M. Witcomb;

8 **University College London Hospitals NHS Foundation Trust (London):** A. Antonopoulos\*, A.  
9 Valnarov-Boulter;

10 **University Hospitals Birmingham NHS Foundation Trust (Birmingham):** J. Cahill\*, S. Khan\*;

11 **University Hospital Southampton NHS Foundation Trust (Southampton):** X. Liu, A.

12 Tamburrini\*, A. Visan;

13 **University Hospital of Wales (Cardiff):** S. Algendy, T. Combellack\*, R. Karsan, M. Musab\*, A.  
14 Sayes, J. Williams\*, S. Zouwail\*;  
15  
16  
17  
18  
19  
20  
21  
22  
23  
24  
25  
26  
27  
28  
29  
30  
31  
32  
33  
34  
35  
36  
37  
38  
39  
40  
41  
42  
43  
44  
45  
46  
47  
48  
49  
50  
51  
52  
53  
54  
55  
56  
57  
58  
59  
60

**Supplementary file 1.****A LUNG RESECTIONS - PRIMARY-MALIGNANT**

- 1 Pneumonectomy including sleeve pneumonectomy
- 2 Lobectomy, bilobectomy
- 3 Sleeve resection lobectomy
- 4 Segmentectomy
- 5 Wedge resection
- 6 Any pulmonary resection with resection of chest wall, diaphragm etc
- 7 Exploratory procedure - no resection

**B LUNG RESECTIONS - ALL OTHER PATHOLOGIES**

- 1 Pneumonectomy
- 2 Lobectomy, bilobectomy
- 3 Sleeve resection
- 4 Segmentectomy
- 5 Wedge resection
- 6 Any pulmonary resection with resection of chest wall, diaphragm etc
- 7 Open lung volume reduction surgery for emphysema
- 8 Other pulmonary procedure

**C MESOTHELIOMA SURGERY (THERAPEUTIC)**

- 1 Extrapleural pneumonectomy
- 2 Extended pleurectomy / decortication
- 3 Pleurectomy/decortication
- 4 Partial pleurectomy

**D PLEURAL PROCEDURES - OTHER**

- 1 Decortication for empyema
- 2 Pneumothorax surgery (pleural symphysis +/- closure of air leak) Other pleural procedures

**E CHEST WALL/DIAPHRAGMATIC PROCEDURES**

1. Correction of pectus deformity (code Nuss/MIRPE in "thoroscopic" column)
- 2 Resection of primary chest wall tumour (not lung cancer)
- 3 Other major
- 4 Minor

**F MEDIASTINAL PROCEDURES**

- 1 Thymectomy for thymoma
- 2 Thymectomy for myasthenia gravis
- 3 Throidectomy

- 1
- 2
- 3 4 Resection of other mediastinal mass/tumour 5 Mediastinoscopy / mediastinotomy
- 4 6 Other mediastinal procedure
- 5
- 6

#### **G OESOPHAGEAL/GASTRIC PROCEDURES**

- 8 1 Oesophago-gastric resection - malignant
- 9 2 Oesophago-gastric resection - non-malignant
- 10 3 Other major oesophagogastric
- 11 4 Exploration only by any route for inoperable tumour 5 Minor oesophagogastric
- 12
- 13
- 14

#### **H TRACHEAL SURGERY (includes carinal resection)**

- 17 1 Tracheal resection - tumour
- 18 2 Tracheal resection - non-tumour
- 19
- 20

#### **I OTHER PROCEDURES**

- 23 1 Major
- 24 2 Minor
- 25
- 26

#### **VATS- A LUNG RESECTIONS - PRIMARY-MALIGNANT**

- 28 1 Pneumonectomy including sleeve pneumonectomy
- 29 2 Lobectomy, bilobectomy
- 30 3 Sleeve resection lobectomy
- 31 4 Segmentectomy
- 32 5 Wedge resection
- 33 6 Any pulmonary resection with resection of chest wall, diaphragm etc 7 Exploratory procedure - no
- 34 resection
- 35
- 36
- 37
- 38

#### **VATS- B LUNG RESECTIONS - ALL OTHER PATHOLOGIES**

- 41 1 Pneumonectomy
- 42 2 Lobectomy, bilobectomy
- 43 3 Sleeve resection lobectomy
- 44 4 Segmentectomy
- 45 5 Wedge resection
- 46 6 Any pulmonary resection with resection of chest wall, diaphragm etc 7 Open lung volume reduction
- 47 surgery for emphysema
- 48 8 Other pulmonary procedure
- 49
- 50
- 51
- 52

#### **VATS- C MESOTHELIOMA SURGERY (THERAPEUTIC)**

- 55 1 Extrapleural pneumonectomy
- 56 2 Extended pleurectomy / decortication
- 57 3 Pleurectomy/decortication
- 58 4 Partial pleurectomy
- 59
- 60

**VATS- D PLEURAL PROCEDURES - OTHER**

- 1 Decortication for empyema
- 2 Pneumothorax surgery (pleural symphysis +/- closure of air leak)
- 3 Other pleural procedures

**VATS- E CHEST WALL/DIAPHRAGMATIC PROCEDURES**

1. Correction of pectus deformity (code Nuss/MIRPE in "thoracoscopic" column) 2 Resection of primary chest wall tumour (not lung cancer)
- 3 Other major
- 4 Minor

**VATS- F MEDIASTINAL PROCEDURES**

- 1 Thymectomy for thymoma
- 2 Thymectomy for myasthenia gravis
- 3 Throidectomy
- 4 Resection of other mediastinal mass/tumour 5 Mediastinoscopy / mediastinotomy
- 6 Other mediastinal procedure

**VATS- G OESOPHAGEAL/GASTRIC PROCEDURES**

- 1 Oesophago-gastric resection - malignant
- 2 Oesophago-gastric resection - non-malignant
- 3 Other major oesophagogastric
- 4 Exploration only by any route for inoperable tumour
- 5 Minor oesophagogastric

**VATS- H TRACHEAL SURGERY (includes carinal resection)**

- 1 Tracheal resection - tumour
- 2 Tracheal resection - non-tumour

**VATS- I OTHER PROCEDURES**

- 1 Major
- 2 Minor

**Z Endoscopic Procedures (Not VATS)**

- 1 Therapeutic bronchoscopy
- 2 Therapeutic oesophagoscopy

## STROBE Statement—checklist of items that should be included in reports of observational studies

|                              | Item No | Recommendation                                                                                                                                                                                                                                                                                                                                                                                                                                                         | Page No |
|------------------------------|---------|------------------------------------------------------------------------------------------------------------------------------------------------------------------------------------------------------------------------------------------------------------------------------------------------------------------------------------------------------------------------------------------------------------------------------------------------------------------------|---------|
| <b>Title and abstract</b>    | 1       | (a) Indicate the study's design with a commonly used term in the title or the abstract                                                                                                                                                                                                                                                                                                                                                                                 | 4       |
|                              |         | (b) Provide in the abstract an informative and balanced summary of what was done and what was found                                                                                                                                                                                                                                                                                                                                                                    | 4       |
| <b>Introduction</b>          |         |                                                                                                                                                                                                                                                                                                                                                                                                                                                                        |         |
| Background/rationale         | 2       | Explain the scientific background and rationale for the investigation being reported                                                                                                                                                                                                                                                                                                                                                                                   | 5       |
| Objectives                   | 3       | State specific objectives, including any prespecified hypotheses                                                                                                                                                                                                                                                                                                                                                                                                       | 5       |
| <b>Methods</b>               |         |                                                                                                                                                                                                                                                                                                                                                                                                                                                                        |         |
| Study design                 | 4       | Present key elements of study design early in the paper                                                                                                                                                                                                                                                                                                                                                                                                                | 5       |
| Setting                      | 5       | Describe the setting, locations, and relevant dates, including periods of recruitment, exposure, follow-up, and data collection                                                                                                                                                                                                                                                                                                                                        | 5,6     |
| Participants                 | 6       | (a) <i>Cohort study</i> —Give the eligibility criteria, and the sources and methods of selection of participants. Describe methods of follow-up<br><i>Case-control study</i> —Give the eligibility criteria, and the sources and methods of case ascertainment and control selection. Give the rationale for the choice of cases and controls<br><i>Cross-sectional study</i> —Give the eligibility criteria, and the sources and methods of selection of participants | 5,6     |
|                              |         | (b) <i>Cohort study</i> —For matched studies, give matching criteria and number of exposed and unexposed<br><i>Case-control study</i> —For matched studies, give matching criteria and the number of controls per case                                                                                                                                                                                                                                                 |         |
| Variables                    | 7       | Clearly define all outcomes, exposures, predictors, potential confounders, and effect modifiers. Give diagnostic criteria, if applicable                                                                                                                                                                                                                                                                                                                               | 5,6     |
| Data sources/<br>measurement | 8*      | For each variable of interest, give sources of data and details of methods of assessment (measurement). Describe comparability of assessment methods if there is more than one group                                                                                                                                                                                                                                                                                   | 5,6     |
| Bias                         | 9       | Describe any efforts to address potential sources of bias                                                                                                                                                                                                                                                                                                                                                                                                              | 5,6     |
| Study size                   | 10      | Explain how the study size was arrived at                                                                                                                                                                                                                                                                                                                                                                                                                              | 6       |
| Quantitative variables       | 11      | Explain how quantitative variables were handled in the analyses. If applicable, describe which groupings were chosen and why                                                                                                                                                                                                                                                                                                                                           | 5,6     |
| Statistical methods          | 12      | (a) Describe all statistical methods, including those used to control for confounding                                                                                                                                                                                                                                                                                                                                                                                  | 6       |
|                              |         | (b) Describe any methods used to examine subgroups and interactions                                                                                                                                                                                                                                                                                                                                                                                                    | 6       |
|                              |         | (c) Explain how missing data were addressed                                                                                                                                                                                                                                                                                                                                                                                                                            | 5,6     |
|                              |         | (d) <i>Cohort study</i> —If applicable, explain how loss to follow-up was addressed<br><i>Case-control study</i> —If applicable, explain how matching of cases and controls was addressed<br><i>Cross-sectional study</i> —If applicable, describe analytical methods taking account of sampling strategy                                                                                                                                                              | 5,6     |
|                              |         | (e) Describe any sensitivity analyses                                                                                                                                                                                                                                                                                                                                                                                                                                  | 6       |

Continued on next page

| <b>Results</b>           |     |                                                                                                                                                                                                              |        |
|--------------------------|-----|--------------------------------------------------------------------------------------------------------------------------------------------------------------------------------------------------------------|--------|
| Participants             | 13* | (a) Report numbers of individuals at each stage of study—eg numbers potentially eligible, examined for eligibility, confirmed eligible, included in the study, completing follow-up, and analysed            | 5,6    |
|                          |     | (b) Give reasons for non-participation at each stage                                                                                                                                                         | 5,6    |
|                          |     | (c) Consider use of a flow diagram                                                                                                                                                                           | 5,6,14 |
| Descriptive data         | 14* | (a) Give characteristics of study participants (eg demographic, clinical, social) and information on exposures and potential confounders                                                                     | 5,6,7  |
|                          |     | (b) Indicate number of participants with missing data for each variable of interest                                                                                                                          | 5,6,7  |
|                          |     | (c) <i>Cohort study</i> —Summarise follow-up time (eg, average and total amount)                                                                                                                             |        |
| Outcome data             | 15* | <i>Cohort study</i> —Report numbers of outcome events or summary measures over time                                                                                                                          |        |
|                          |     | <i>Case-control study</i> —Report numbers in each exposure category, or summary measures of exposure                                                                                                         |        |
|                          |     | <i>Cross-sectional study</i> —Report numbers of outcome events or summary measures                                                                                                                           | 7,8    |
| Main results             | 16  | (a) Give unadjusted estimates and, if applicable, confounder-adjusted estimates and their precision (eg, 95% confidence interval). Make clear which confounders were adjusted for and why they were included | 7,8    |
|                          |     | (b) Report category boundaries when continuous variables were categorized                                                                                                                                    | 7,8    |
|                          |     | (c) If relevant, consider translating estimates of relative risk into absolute risk for a meaningful time period                                                                                             |        |
| Other analyses           | 17  | Report other analyses done—eg analyses of subgroups and interactions, and sensitivity analyses                                                                                                               | 7,8    |
| <b>Discussion</b>        |     |                                                                                                                                                                                                              |        |
| Key results              | 18  | Summarise key results with reference to study objectives                                                                                                                                                     | 8      |
| Limitations              | 19  | Discuss limitations of the study, taking into account sources of potential bias or imprecision. Discuss both direction and magnitude of any potential bias                                                   | 9      |
| Interpretation           | 20  | Give a cautious overall interpretation of results considering objectives, limitations, multiplicity of analyses, results from similar studies, and other relevant evidence                                   | 8,9    |
| Generalisability         | 21  | Discuss the generalisability (external validity) of the study results                                                                                                                                        | 8,9    |
| <b>Other information</b> |     |                                                                                                                                                                                                              |        |
| Funding                  | 22  | Give the source of funding and the role of the funders for the present study and, if applicable, for the original study on which the present article is based                                                | 2      |

\*Give information separately for cases and controls in case-control studies and, if applicable, for exposed and unexposed groups in cohort and cross-sectional studies.

**Note:** An Explanation and Elaboration article discusses each checklist item and gives methodological background and published examples of transparent reporting. The STROBE checklist is best used in conjunction with this article (freely available on the Web sites of PLoS Medicine at <http://www.plosmedicine.org/>, Annals of Internal Medicine at <http://www.annals.org/>, and Epidemiology at <http://www.epidem.com/>). Information on the STROBE Initiative is available at [www.strobe-statement.org](http://www.strobe-statement.org).

# BMJ Open

## Multi-centre Evaluation of Renal Impairment in Thoracic Surgery (MERITS): a retrospective cohort study

|                                 |                                                                                                                                                                                                                                                                                                                                                                                                                                                                                                      |
|---------------------------------|------------------------------------------------------------------------------------------------------------------------------------------------------------------------------------------------------------------------------------------------------------------------------------------------------------------------------------------------------------------------------------------------------------------------------------------------------------------------------------------------------|
| Journal:                        | <i>BMJ Open</i>                                                                                                                                                                                                                                                                                                                                                                                                                                                                                      |
| Manuscript ID                   | bmjopen-2021-058542.R1                                                                                                                                                                                                                                                                                                                                                                                                                                                                               |
| Article Type:                   | Original research                                                                                                                                                                                                                                                                                                                                                                                                                                                                                    |
| Date Submitted by the Author:   | 09-Jun-2022                                                                                                                                                                                                                                                                                                                                                                                                                                                                                          |
| Complete List of Authors:       | Naruka, Vinci; Royal Papworth Hospital NHS Foundation Trust, Department of Cardiothoracic Surgery<br>McKie, Mikel; Papworth Hospital NHS Foundation Trust, Clinical Trials Unit; MRC Biostatistics Unit<br>Ahmadi, Navid; Royal Papworth Hospital NHS Foundation Trust<br>Pama, Claudia; Royal Papworth Hospital NHS Foundation Trust, Department of Cardiothoracic Surgery<br>Coonar, Aman; Papworth Hospital NHS Foundation Trust, Thoracic Surgery<br>Collaborators, MERITS; MERITS Collaborators |
| <b>Primary Subject Heading</b>: | Surgery                                                                                                                                                                                                                                                                                                                                                                                                                                                                                              |
| Secondary Subject Heading:      | Renal medicine                                                                                                                                                                                                                                                                                                                                                                                                                                                                                       |
| Keywords:                       | Thoracic surgery < SURGERY, AUDIT, Acute renal failure < NEPHROLOGY                                                                                                                                                                                                                                                                                                                                                                                                                                  |
|                                 |                                                                                                                                                                                                                                                                                                                                                                                                                                                                                                      |

SCHOLARONE™  
Manuscripts

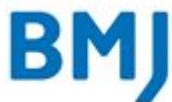

I, the Submitting Author has the right to grant and does grant on behalf of all authors of the Work (as defined in the below author licence), an exclusive licence and/or a non-exclusive licence for contributions from authors who are: i) UK Crown employees; ii) where BMJ has agreed a CC-BY licence shall apply, and/or iii) in accordance with the terms applicable for US Federal Government officers or employees acting as part of their official duties; on a worldwide, perpetual, irrevocable, royalty-free basis to BMJ Publishing Group Ltd ("BMJ") its licensees and where the relevant Journal is co-owned by BMJ to the co-owners of the Journal, to publish the Work in this journal and any other BMJ products and to exploit all rights, as set out in our [licence](#).

The Submitting Author accepts and understands that any supply made under these terms is made by BMJ to the Submitting Author unless you are acting as an employee on behalf of your employer or a postgraduate student of an affiliated institution which is paying any applicable article publishing charge ("APC") for Open Access articles. Where the Submitting Author wishes to make the Work available on an Open Access basis (and intends to pay the relevant APC), the terms of reuse of such Open Access shall be governed by a Creative Commons licence – details of these licences and which [Creative Commons](#) licence will apply to this Work are set out in our licence referred to above.

Other than as permitted in any relevant BMJ Author's Self Archiving Policies, I confirm this Work has not been accepted for publication elsewhere, is not being considered for publication elsewhere and does not duplicate material already published. I confirm all authors consent to publication of this Work and authorise the granting of this licence.



1  
2  
3 1 Multi-centre Evaluation of Renal Impairment in Thoracic Surgery (MERITS): a retrospective  
4 2 cohort study  
5 3

6 4 Authors

7 5 The MERITS collaborators<sup>1</sup>  
8 6

9 7 <sup>1</sup> MERITS collaborators named in Appendix 1  
10 8

11 9 Royal Papworth Hospital, Cambridge, CB2 0AY, United Kingdom, Vinci Naruka, Cardiothoracic Surgery  
12 10 trainee,

13 11 Department of Cambridge Institute of Public Health, Medical Research Council Biostatistics Unit, University of  
14 12 Cambridge School of Clinical Medicine, Cambridge, CB2 0SR, United Kingdom, Mikel Mckie, Research  
15 13 Associate,

16 14 Royal Papworth Hospital, Cambridge, CB2 0AY, United Kingdom, Navid Ahmadi, Junior doctor

17 15 Royal Papworth Hospital, Cambridge, CB2 0AY, United Kingdom, Claudia Pama, Junior doctor

18 16 Royal Papworth Hospital, Cambridge, CB2 0AY, United Kingdom, Aman Coonar, Consultant Thoracic  
19 17 Surgeon.  
20 18

21 19  
22 20 Correspondence to:

23 21 Mr Aman Coonar, Department of Cardiothoracic Surgery, Royal Papworth Hospital, Cambridge University  
24 22 Health Partners,

25 23 e-mail: [aman.coonar@nhs.net](mailto:aman.coonar@nhs.net)  
26 24  
27 25

28 26 **Contributors and guarantor information:**

29 27 MERITS collaborators named in Appendix 1

30 28 Writing committee: Vinci Naruka has been involved in conceptualisation, design, methodology, data curation,  
31 29 project administration, validation, writing and reviewing the manuscript, Mikel A Mckie has been involved in  
32 30 data curation, formal analysis, methodology, validation, writing and reviewing the manuscript, Navid Ahmadi  
33 31 has been involved in project administration, writing and reviewing the manuscript, Claudia Pama has been  
34 32 involved in the response to reviewers and data administration, Aman S Coonar has been involved in  
35 33 conceptualisation, design, methodology, data curation, project administration, validation, supervision, writing  
36 34 and reviewing the manuscript.

37 35 Steering committee: involved in validation and reviewing the manuscript.

38 36 Thoracic Centre Principal Investigators from each centre held responsibility over data collection and validation.

39 37 Local coordinators and collaborators were involved in data collection.

40 38 The corresponding author attests that all listed authors meet authorship criteria and that no others meeting the  
41 39 criteria have been omitted.  
42 40

43 41 **Copyright/ licence for publication**  
44 42

45 43 The Corresponding Author has the right to grant on behalf of all authors and does grant on behalf of all authors,  
46 44 a worldwide licence to the Publishers and its licensees in perpetuity, in all forms, formats and media (whether  
47 45 known now or created in the future), to i) publish, reproduce, distribute, display and store the Contribution, ii)  
48 46 translate the Contribution into other languages, create adaptations, reprints, include within collections and create  
49 47 summaries, extracts and/or, abstracts of the Contribution, iii) create any other derivative work(s) based on the  
50 48 Contribution, iv) to exploit all subsidiary rights in the Contribution, v) the inclusion of electronic links from the  
51 49 Contribution to third party material where-ever it may be located; and, vi) licence any third party to do any or all  
52 50 of the above.  
53 51

54 52  
55 53 **Competing interest:**

56 54 No Competing interests: All authors have completed the ICMJE uniform disclosure form

57 55 at [www.icmje.org/disclosure-of-interest/](http://www.icmje.org/disclosure-of-interest/) and declare no support from any organisation for the submitted work;  
58 56 no financial relationships with any organisations that might have an interest in the submitted work in the  
59 57 previous three years; no other relationships or activities that could appear to have influenced the submitted  
60 58 work.  
60 59  
60 60

**Ethical Approval:**

The project was approved by the Clinical Audit and Effectiveness Department at the study centre which was Royal Papworth Hospital, Cambridge (Registration Number: 1702) with a waiver for the need for patient consent and was approved as a multi-centre audit. This study was then registered as a clinical audit at each of the collaborating hospitals. This study was supported by the Royal Papworth Hospital Research & Development Department and by SCTS STUDENTS, the student wing of the Society for Cardiothoracic Surgery in Great Britain & Ireland and the UK & Ireland Thoracic Surgery Forum. Data received from the participating units was anonymised before the authors accessed it for the purpose of this study.

**Transparency Statement:**

The lead authors (VN and ASC) affirm that the manuscript is an honest, accurate, and transparent account of the study being reported; that no important aspects of the study have been omitted; and that any discrepancies from the study as planned (and, if relevant, registered) have been explained.

**Role of the funding source:**

Statistical support was provided from the MRC Biostatistics Unit Cambridge through the Papworth Trials Unit Collaboration. No additional funds were used, and the work was done on a voluntary basis by all the collaborators.

**Data Sharing**

All data was anonymised before being accessed for purpose of this study. Data was retrospectively collected for the year 2016/17. Data analysed is included within the article and raw data are available upon reasonable request.

Word count: 3050

**KEYWORDS:**

Acute Kidney Injury (AKI), Renal Impairment, Quality Improvement, Audit, Multicentre, Mortality, Length of stay, Thoracic Surgery.

## ABSTRACT

**Objectives-** To measure the unit-level variation in AKI incidence post-thoracic surgery over a contemporary 1-year period. Secondary aims include examining the associations with sex, age group, operation type, length of stay and mortality.

**Design-** A multi-centre, observational, retrospective study in thoracic surgery.

**Setting-** 17 of 35 UK thoracic surgery units participated. SCTS STUDENTS supported data collection.

**Participants-** Overall, 15229 patients were collected of which 15154 were included for analysis after exclusions. All patients (age $\geq$ 18 years) undergoing any thoracic surgery from 01.04.2016 to 31.3.2017 were included. For analysis, we excluded patients with pre-operative end-stage renal failure and those with incomplete data.

**Main Outcome measures-** The primary outcome is the incidence of AKI within 7 days of the procedure or discharge date if earlier. Secondary outcomes include assessing associations with patient demographics (age, sex), type of procedure (open and minimally invasive), length of stay and mortality.

**Results-** 17 of 35 UK centres provided data on 15154 patients. AKI was diagnosed in 1090 patients (7.2%) within 7 days of surgery with AKI stage 1 (4.8%), stage 2 (1.7%) and stage 3 (0.7%). There was a statistically significant variation in AKI incidence between units from 3.1 to 16.1% ( $p<0.05$ ). Significant differences between non-AKI and AKI were found in post-operative length of stay (3 vs 7 days,  $p<0.001$ ), 30-day mortality (1.6 vs 9%,  $p<0.001$ ), 90-day mortality (4.4 v 14.7%,  $p<0.001$ ) and 1-year mortality (12.2 vs 23.1%,  $p<0.001$ ).

**Conclusions-** Following thoracic surgery, AKI incidence ranged from 3.1% to 16.1% between units ( $p<0.05$ ) with associations between AKI and both length of stay and mortality. We propose AKI as a suitable comparative and absolute quality measure in thoracic surgery. Reducing rates of AKI may improve patient outcomes, length of stay and reduce costs.

### Strengths and limitations of this study

- MERITS is one of the largest studies in acute kidney injury and thoracic surgery worldwide
- We collected simple, robust and pragmatic data variables that were previously identified in the pilot study.
- The observational design of this multi-centre study does not allow conclusions regarding causal links between AKI and the outcomes.
- The study did not collect co-morbidities that have been previously associated with AKI as this was not the intent of the study objectives and design.

# MANUSCRIPT

## INTRODUCTION

To achieve the best patient outcomes after surgery and drive quality improvement, suitable outcome measures are needed. Traditionally, mortality has been used, but because of improved care, mortality is now very low in thoracic surgery. The 2019 lung cancer clinical outcomes project (LCCOP) report (for operations in 2017) gave survival rates of 98.1% at 30 days and 88.7% at 1-year post-surgery for primary lung cancer in NHS England.[1] There were no negative outliers and one positive outlier at 30 days. At one year, there were no outliers. In the Society for Cardiothoracic Surgery of Great Britain and Ireland (SCTS) thoracic surgery audit [2] from 1st April 2016- 31st March 2017, 28,740 cases in total were reported to the SCTS from units in the UK and Republic of Ireland. The overall in-hospital unadjusted mortality rate for this period was 1.16% (334 deaths/28,740 cases). This is reassuring for patients and clinicians. However, when an outcome has little variation, it means that there are limitations in using it to compare performance.

As a result, there is a need to identify and then validate additional outcome measures. Such a metric should be i. easy to reliably measure, ii. be associated with meaningful health and system outcomes and iii. show sufficient variation. This study aims to assess acute kidney injury (AKI) [3] as such a performance measure.

Acute Kidney Injury (AKI) is not well documented in thoracic surgery. Only three relevant publications report an incidence of AKI post-thoracic surgery: 5.9% after all lung resections,[4] and 6.8% and 10% after lung cancer resections.[5,6] AKI is well recognised after cardiac surgery and is associated with worse morbidity, mortality and more costs.[7–10] AKI has been studied in other surgical fields with rates from 6-12% in gastrointestinal surgery and 23-25% in vascular surgery.[11]

Our previous single-centre pilot study found an incidence of AKI post-thoracic surgery of 15.1% (86/568).[12] AKI was also associated with a longer hospital stay. However, in order to explore variation, a single centre study is not sufficient. Having multi-centre estimates of incidence and baseline characteristics of AKI after thoracic surgery would allow benchmarking and quality improvement and standards to guide practice. In order to better understand AKI in thoracic surgery, we developed this project: “Multicentre Evaluation of Renal Impairment in Thoracic Surgery” (MERITS).

The primary aim was to determine the unit-level variation in the incidence of AKI post thoracic surgery over a contemporary 1-year period. Secondary aims were to report associations with sex, age, operation type, length of stay and mortality. This study is not designed to show causation.

We now report significant variation of AKI incidence post thoracic surgery across the participating centres and found that AKI was associated with increased length of stay and mortality.

## METHODS

### Study design

MERITS is a multi-centre, observational, retrospective study in thoracic surgery, composed of a collaboration of 17 thoracic surgery centres participating in the already established SCTS thoracic surgery rolling audit. SCTS includes the thoracic surgery units from 5 different national health care systems (Eire, England, Scotland, Northern Ireland and Wales)

All 35 hospitals in the UK and Ireland that offer adult thoracic surgery and report to the SCTS thoracic surgery audit were invited. Seventeen units participated. Each participating thoracic surgery unit team comprised a consultant thoracic surgeon lead, a day-to-day coordinator (usually a middle-grade doctor or a research nurse), and a group of medical students recruited by SCTS STUDENTS.

### Inclusion and Exclusion criteria:

All patients (age  $\geq$  18 years) undergoing any thoracic surgery from 1<sup>st</sup> April-2016 to 31<sup>st</sup> March-2017 (date of 1<sup>st</sup> surgery within these dates) were included. For analysis, we excluded patients with pre-operative end-stage renal failure and those with incomplete data.

## Variables:

Our previous pilot study [12] had identified variables which were both pragmatic to collect, robust and clinically meaningful. These were: the submitted SCTS thoracic surgery operation code (please refer to Supplementary file 1 and Table 1), dates of birth, operation, discharge, death (if applicable); sex; AKI stage (1, 2 or 3); peak creatinine; pre and post-operative renal replacement therapy. Thoracic surgery operations were recorded using the accepted SCTS code for 2016/17. Survival was collected for 1-year post-surgery.

To accurately collect renal function data, each thoracic unit contacted their respective biochemistry department and extracted the AKI stage and peak creatinine up to 7 days from the operation or discharge date if earlier. AKI stage was calculated using the algorithm introduced by the NHS England Patient Safety Alert to standardise AKI identification.[13] In 3 of 17 units, creatinine was collected manually, and the AKI staging was calculated following the same algorithm.

Our pilot study [12] had previously found that urine volumes were not collected or recorded reliably; therefore, we did not collect this in MERITS. In modern thoracic surgery practice within our nations, urinary catheterisation and strict urine volume recording is not commonly performed, and so urine output is not a robust measure.

## Outcome measures

The primary outcome is the incidence of AKI occurring within 7 days of the procedure or discharge date if earlier. Secondary outcomes include assessing associations with patient demographics (age group, sex), type of procedure (open and minimally invasive), length of stay and mortality.

## Data quality, security and validation:

The majority of data collectors were medical students who were recruited by SCTS STUDENTS and junior doctors. All participants were provided with an online training package as part of the local site set-up. They were supervised by a day-to-day coordinator (usually a middle-grade cardiothoracic surgeon or a research nurse) and a consultant surgeon. Data was entered locally onto a spreadsheet with each team securely retaining a non-anonymised version. A secure anonymised version was sent to the MERITS study centre. Validation with each centre was performed before analysis. Digital security followed GDPR guidelines.

Data were validated by two observers who were not involved in the original data collection. Individual unit analysis was shared with each unit lead for checking and approval.

## Data collection period:

The launch for MERITS was in March 2018 at the SCTS Annual Meeting in Glasgow. This was followed by local regulatory approvals. Site opening and the recruitment of students and other data collectors took place during Summer 2018. All participants were provided with site packs with access to key documents for the study design, including on-line training videos.[14]

## Statistical analysis:

Continuous variables were summarised with the following descriptive statistics, non-missing sample size, mean and 95% and 99.8% confidence intervals or medians with interquartile range (IQR) where appropriate. Categorical data such as AKI incidence was summarised using frequencies and percentages calculated using the non-missing sample size. Univariate hypothesis testing was undertaken by Mann Whitney U tests for continuous data and Chi-squared for categorical data.

Multivariate analysis was also undertaken using generalised linear mixed modelling (GLMM) to assess the associations between AKI incidence and the fixed effects of our covariates plus random variation in intercept among centres. Our fixed effects include age group (Young <60 years / Old 60-79 years / Oldest Old  $\geq$  80 years) [15,16], sex (M/F) and operation type (Open/VATs/Endoscopic). All centres were included as random effect intercepts with a fixed gradient. Model fit was assessed by the Hosmer-Lemeshow goodness of fit test, by computing receiver operating characteristics and Nakagawa's pseudo  $r^2$  for mixed effect models. The associations of the fixed effects were estimated and reported as odds ratios with 95% confidence intervals. The

1 conditional modes of the random effect intercepts and their 95% confidence intervals were also derived to assess  
2 centre specific variation in isolation from fixed effects.

#### 3 Ethics, approval and dissemination:

4 The project was approved by the Clinical Audit and Effectiveness Department at the study centre which was  
5 Royal Papworth Hospital, Cambridge (Registration Number: 1702) with a waiver for the need for patient  
6 consent and was approved as a multi-centre audit. This study was then registered as a clinical audit at each of  
7 the collaborating hospitals. The protocol and invitation to participate was disseminated widely through student  
8 networks and societies in the UK and Ireland.

#### 9 Patient and Public involvement

10 No patients were involved in setting the research question or the outcome measures, nor were they involved in  
11 developing plans for design or implementation of the study. No patients were asked to advise on interpretation  
12 or writing up of results. No plans have been made to disseminate the results of the research to study participants.

#### 13 **Patient and Public Involvement statement:**

14 No patients were involved in setting the research question or the outcome measures, nor were they involved in  
15 developing plans for design or implementation of the study. No patients were asked to advise on interpretation  
16 or writing up of results. No plans have been made to disseminate the results of the research to study participants.

## 17 **RESULTS**

### 18 Subjects

19 Overall, 15229 patients were collected of which 15154 were included for analysis after exclusions (Figure 1).  
20 These were from 17 out of 35 thoracic surgical units in the UK. Unit operative volumes ranged from 304 to  
21 2416 patients per year. The total number of thoracic surgery operations submitted to SCTS in 2016-17 was  
22 28740. This study represented 52.7% of all operations reported.

23 Table 1 shows the sex, age groups, whether open, VATS or endoscopic and SCTS operation code category are  
24 shown along with the proportion with and without AKI.

### 25 Demographics

26 8809 (58.1%) patients were male and 6345 (41.9%) were female.

27 Average age at operation was  $60.7 \pm 16.8$  years. Age was divided into 3 categories; 5958 (39.3%) were <60  
28 years, 8197 (54.1%) was 60-79 years and 998 (6.6%) were  $\geq 80$  years. One patient's age was not reliably  
29 confirmed.

### 30 Minimally invasive versus open surgery

31 The breakdown of operations as completed was as follows: 5835 (38.5%) operations were open, 7635 (50.4%)  
32 were minimally invasive video-assisted thoracic surgery (VATS), 1684 (11.1%) were endoscopic (such as  
33 bronchoscopy). 20 cases were reported as robotic and were included with the minimally invasive VATS group.

### 34 SCTS operation code category

35 The breakdown of operations is also shown in Table 1. The largest categories were lung resections for primary  
36 lung cancer (category A, 4502 cases, 29.8%), pleural diseases (category D, 3311 cases, 21.8%) and lung  
37 resections for reasons other than lung cancer (category B, 1930 cases, 12.8%). All lung resections (categories A  
38 and B) accounted for 42.6% of the workload.

### 39 Characteristics of AKI

#### 40 Incidence of AKI



1  
2  
3 1 Of 15154 patients, 1090 (7.2%) were found to have developed AKI within 7 days post-thoracic surgery: stage 1  
4 2 (n= 731; 4.8%); stage 2 (n=255; 1.7%); and stage 3 (n=104; 0.7%). AKI incidence ranged between 3.1% to  
5 3 16.1%. The units have been listed in rank order from 1 to 17 (with 1 being the lowest rate of AKI and 17 the  
6 4 highest). This is shown numerically in Table 2 and Forest plot Figure 2.

#### 7 5 8 6 AKI rate in open and minimally invasive surgery

9 7  
10 8 9.9% of patients undergoing open surgery developed AKI versus 6.0% undergoing VATS and 3.6% undergoing  
11 9 endoscopic procedures (Table 1).

#### 12 10 13 11 Adjusted AKI variation across units

14 12  
15 13 To assess centre variation and associations more accurately between our covariates and AKI incidence we  
16 14 undertook a multivariate analysis. Using the GLMM framework, we adjusted our observed clinically relevant  
17 15 variables by defining our fixed effects terms as age group, sex and operation type with each centre represented  
18 16 by a random effect intercept with a fixed gradient.

19 17  
20 18 All fixed effects showed a significant relationship with developing AKI post operatively. Male patients had a  
21 19 1.37x (CI 95% 1.21-1.57; P<0.001) increased odds of developing AKI. Patients between the age of 60-79 had a  
22 20 1.99x (CI 95% 1.72-2.30; P<0.001) increased odds of developing AKI; and above 80 had a 3.01x (CI 95% 2.4-  
23 21 3.8; P<0.001) increased odds of developing AKI. There was a 1.7x (CI 95% 1.48-1.94; P<0.001) increased odds  
24 22 of developing AKI with open procedures compared to VATS (Table 3).

25 23  
26 24 We then derived the conditional mode of the random intercepts for each centre to assess the adjusted centre to  
27 25 centre variation (Figure 3). We found that there was significant variation in 11/17 (64.7%) of the sampled  
28 26 centres after adjusting for our observed covariates. This suggests that there was significant variation across the  
29 27 centres.

30 28  
31 29 Model diagnostics showed no evidence of lack of fit (HL test, p = 0.32), and a reasonable level of  
32 30 discrimination with a c-statistic of 0.71. However, our model did not explain much of the variability in the data  
33 31 (Conditional pseudo  $r^2 = 0.15$ ), meaning there are likely to be unobserved explanatory covariates.

#### 34 32 35 33 Length of stay

36 34  
37 35 Patients with AKI (as compared to those without) had an increased median postoperative length of stay of 4  
38 36 days as compared to non-AKI (7 v 3 days; p<0.001) (Table 4).

39 37  
40 38 The total increase in length of stay accounts for 4360 days across the 1090 AKI-positive patients or 5.1%  
41 39 (4360/86054) of the total number of days spent in the hospital after thoracic surgery in our study population.

#### 42 40 43 41 Mortality

44 42  
45 43 Patients with AKI (as compared to those without) had a significantly increased mortality at 30-days (AKI 9% vs  
46 44 no AKI 1.6%; p<0.001); 90 day (14.7% v 4.4%) and 1 year (23.1 vs 12.2%; p<0.001) (Table 4).

47 45  
48 46 Across centres, we found that mortality varied between 0.3%-5.1% at 30 days, 2.0%-9.6% at 90 days and 3.2%-  
49 47 19.0% at 1 year (Figure 4 a-c). We observed that the ranking of AKI differed from the ranking of mortality. For  
50 48 instance, the unit with the highest rate of AKI, did not have the highest level of mortality. We also observed that  
51 49 the ranking of mortality changed over the three time points.

## 52 50 53 51 **DISCUSSION**

54 52  
55 53 MERITS is the largest study to examine AKI after thoracic surgery and one of the largest such studies in a  
56 54 surgical population.[4-6] Previous single centre studies showed AKI rates that varied from 5.9% after all lung  
57 55 resections [4] to 6.8% and 10% after lung cancer resections.[5,6] Our earlier single-centre pilot study  
58 56 incorporating all procedures found a rate of 15.1%.[12]  
59 57

1  
2  
3 1 The primary aim was to examine the unit variation in AKI incidence after thoracic surgery. This study of 17  
4 2 units found an overall AKI rate of 7.2% with a range from 3.1% to 16.1%. The spread was statistically  
5 3 significant.

6 4  
7 5 We have also shown that the post-thoracic surgery AKI variation was greater than the postoperative death rate  
8 6 reported in a similar period. In the 2019 LCCOP report, the overall in-hospital mortality was 1.26% (334 of  
9 7 26460 patients) with 1 positive unit outlier at 30 days and no unit outliers at 1 year.

10 8  
11 9 Thus, we have shown that AKI has a greater variation in incidence than the death rate. In this study after  
12 10 adjustment, there are 5 positive and 6 negative statistical unit outliers (Figure 3), which would support the use of  
13 11 AKI as a performance metric.

14 12  
15 13 This study showed the variation in AKI between units is greater than the variation in mortality. However, there  
16 14 was not a consistent relationship between AKI and mortality. For example, the unit with the highest rate of AKI  
17 15 (unit 17 in Table 1 and Figure 2 and 3) had a much lower mortality rate. The explanation for this is not obvious,  
18 16 and it is likely to be multifactorial. One explanation is that in that unit post-operative steps effectively treat AKI  
19 17 though do not prevent its occurrence as compared to other units. Examining the case-mix and different practices  
20 18 between units will be the start of exploring the reasons for this difference and this can drive quality  
21 19 improvement.

22 20  
23 21 We went on to demonstrate a statistically significant association between AKI and length of stay and mortality.  
24 22 There are many studies in different clinical situations which observe similar findings. It is recognised that AKI  
25 23 is an independent predictor of death [17] even with mild transient AKI post-surgery.[18] Patients who develop  
26 24 AKI are at increased risk of chronic kidney disease and end-stage renal failure.[19]

27 25  
28 26 Because AKI is sometimes preventable and reducing its rate is associated with better outcomes, there are  
29 27 important potential health and economic benefits of monitoring and reducing AKI rates.[20] There is a national  
30 28 programme in the UK to increase AKI awareness and to prevent and treat it.

31 29  
32 30 The relationship between AKI and longer stay is also intuitively clear. In this study, the associated unadjusted  
33 31 median increase in bed occupancy is 5.1%, corresponding to 4360 days. While there will be various  
34 32 contributory factors, it follows that reducing postoperative AKI is also likely to reduce the length of stay.

35 33  
36 34 We found that increased age and male sex were also associated with an increased risk of AKI. Various reasons  
37 35 can be speculated. Renal function declines with age and the nephrotoxic impact of surgery and anaesthesia may  
38 36 be greater. Perioperative hypotension for example may be less well tolerated.

39 37  
40 38 Importantly, we found that open surgery is associated with a significantly greater risk of AKI than minimally  
41 39 invasive surgery. The reasons for this may be related to the greater tissue injury associated with an open  
42 40 operation, but there could also be other factors such as complexity and length of the surgery. We speculate that  
43 41 the latter is more likely and this is another area to be explored.

44 42  
45 43 MERITS is one of the largest studies ever conducted in acute kidney injury and thoracic surgery worldwide.  
46 44 Furthermore, it is one of the largest collaborations of thoracic surgical units in the UK and was achieved without  
47 45 any extra funding. This was only possible because of a strong collaborative professional culture including  
48 46 students recruited from SCTS STUDENTS. The success of the project also relied on collecting simple, robust  
49 47 and pragmatic data variables that were previously identified in the pilot study.

50 48  
51 49 This study has some limitations. The observational design of this multi-centre study precludes conclusions  
52 50 regarding causal links between AKI and the outcomes. AKI was diagnosed based on renal function only as urine  
53 51 output data could not be collected reliably. We were reliant on the coding of cases according to the SCTS  
54 52 database. The categorisation is high-level and no intraoperative details are collected. The study also did not  
55 53 collect co-morbidities that have been previously associated with AKI as this was not the intent of the study  
56 54 objectives and design. This could be addressed in a future study.

57 55  
58 56 In summary, we have identified a significant variation in AKI rates between units post thoracic surgery. This  
59 57 will be due to multiple factors and reflect different surgical and anaesthetic strategies as well as patient  
60 58 heterogeneity. This is likely to include different approaches to perioperative cardiac output control, fluid  
management and use of nephrotoxic agents. Historically patients undergoing thoracic surgery were often  
relatively dehydrated on the basis that this may reduce the rate of acute lung injury associated with positive-



1  
2  
3 1 pressure ventilation and surgical trauma. This is different to some of the concepts of enhanced recovery which  
4 2 encourage hydration and euvolaemia.[21] It would be useful to consider the approach of the better performing  
5 3 units to determine what practices could be disseminated in line with the quality improvement strategy of the  
6 4 NHS.[22]  
7  
8 5  
9 6  
10 7  
11  
12  
13  
14  
15  
16  
17  
18  
19  
20  
21  
22  
23  
24  
25  
26  
27  
28  
29  
30  
31  
32  
33  
34  
35  
36  
37  
38  
39  
40  
41  
42  
43  
44  
45  
46  
47  
48  
49  
50  
51  
52  
53  
54  
55  
56  
57  
58  
59  
60

For peer review only

## 1 TABLES

2

3 Table 1. Age, sex, operation mode and SCTS code and proportion with AKI

4

| n                                     | level                                       | Overall<br>15154 | AKI Negative<br>14064 | AKI Positive<br>1090 |
|---------------------------------------|---------------------------------------------|------------------|-----------------------|----------------------|
| Gender n (%)                          | F                                           | 6345             | 5967 (94.0)           | 378 (6.0)            |
|                                       | M                                           | 8809             | 8097 (91.9)           | 712 (8.1)            |
| Age group n (%)                       | Young                                       | 5958             | 5686 (95.4)           | 272 (4.6)            |
|                                       | Old                                         | 8197             | 7500 (91.5)           | 697 (8.5)            |
|                                       | Oldest                                      | 998              | 877 (87.9)            | 121 (12.1)           |
| Operation access mode n (%)           | OPEN                                        | 5835             | 5260 (90.1)           | 575 (9.9)            |
|                                       | VATS                                        | 7635             | 7180 (94.0)           | 455 (6.0)            |
|                                       | ENDO                                        | 1684             | 1624 (96.4)           | 60 (3.6)             |
| SCTS operation code category<br>n (%) | A – lung resections (primary malignant)     | 4502             | 4052 (90.0)           | 450 (10.0)           |
|                                       | B – lung resections (all other pathologies) | 1930             | 1812 (93.9)           | 118 (6.1)            |
|                                       | C – mesothelioma surgery (therapeutic)      | 452              | 416 (92.0)            | 36 (8.0)             |
|                                       | D – pleural procedures (other)              | 3311             | 3084 (93.1)           | 227 (6.9)            |
|                                       | E – chest wall/diaphragmatic procedures     | 734              | 693 (94.4)            | 41 (5.6)             |
|                                       | F – mediastinal procedures                  | 1484             | 1433 (96.6)           | 51 (3.4)             |
|                                       | G – oesophageal/gastric procedures          | 50               | 41 (82.0)             | 9 (18)               |
|                                       | H – tracheal surgery                        | 13               | 12 (92.3)             | 1 (7.7)              |
|                                       | I – other procedures                        | 939              | 847 (90.2)            | 92 (9.8)             |
| Z – endoscopic procedures             | 1684                                        | 1624 (96.4)      | 60 (3.6)              |                      |

5

6

7

8

1  
2  
3 1 Table 2. AKI incidence (%) by unit in rank order  
4 2  
5 3  
6

| 7  | Anonymised Centre ID | Centre Size | AKI Negative | AKI Positive |
|----|----------------------|-------------|--------------|--------------|
| 8  |                      |             |              |              |
| 9  | 1                    | 1233        | 1195 (96.9)  | 38 (3.1)     |
| 10 | 2                    | 1267        | 1227 (96.8)  | 40 (3.2)     |
| 11 | 3                    | 1037        | 1003 (96.7)  | 34 (3.3)     |
| 12 | 4                    | 497         | 480 (96.6)   | 17 (3.4)     |
| 13 | 5                    | 716         | 691 (96.5)   | 25 (3.5)     |
| 14 | 6                    | 615         | 587 (95.4)   | 28 (4.6)     |
| 15 | 7                    | 1341        | 1265 (94.3)  | 76 (5.7)     |
| 16 | 8                    | 513         | 482 (94.0)   | 31 (6.0)     |
| 17 | 9                    | 716         | 668 (93.3)   | 48 (6.7)     |
| 18 | 10                   | 1413        | 1308 (92.6)  | 105 (7.4)    |
| 19 | 11                   | 458         | 423 (92.4)   | 35 (7.6)     |
| 20 | 12                   | 518         | 473 (91.3)   | 45 (8.7)     |
| 21 | 13                   | 645         | 586 (90.9)   | 59 (9.1)     |
| 22 | 14                   | 2384        | 2122 (89.0)  | 262 (11.0)   |
| 23 | 15                   | 922         | 807 (87.5)   | 115 (12.5)   |
| 24 | 16                   | 301         | 262 (87.0)   | 39 (13.0)    |
| 25 | 17                   | 578         | 485 (83.9)   | 93 (16.1)    |

31  
32 4  
33 5  
34 6  
35  
36  
37  
38  
39  
40  
41  
42  
43  
44  
45  
46  
47  
48  
49  
50  
51  
52  
53  
54  
55  
56  
57  
58  
59  
60

Table 3. AKI modelling for gender, age and operation type.

|                |                | 95% confidence intervals |             |             |         |
|----------------|----------------|--------------------------|-------------|-------------|---------|
|                |                | Odds ratio               | Lower bound | Upper bound | P value |
|                | (Intercept)    | 0.03                     | 0.02        | 0.04        | <0.001  |
| Gender         | Female         | 1.00                     | Reference   |             |         |
|                | Male           | 1.37                     | 1.20        | 1.57        | <0.001  |
| Age            | Youngest (<60) | 1.00                     | Reference   |             |         |
|                | Old (60-79)    | 1.99                     | 1.72        | 2.30        | <0.001  |
|                | Oldest (80+)   | 3.02                     | 2.40        | 3.80        | <0.001  |
| Operation Type | VATS           | 1.00                     | Reference   |             |         |
|                | OPEN           | 1.70                     | 1.48        | 1.94        | <0.001  |
|                | Endoscopy      | 0.54                     | 0.41        | 0.71        | <0.001  |

Table 4. Associations between AKI and mortality and length of stay

|                               | Level    | AKI Negative      | AKI Positive       | p      |
|-------------------------------|----------|-------------------|--------------------|--------|
| N                             |          | 14064             | 1090               |        |
| 30 day Mortality (%)          | Survived | 13846 (98.4)      | 992 (91.0)         | <0.001 |
|                               | Died     | 218 (1.6)         | 98 (9.0)           |        |
| 90 Day mortality (%)          | Survived | 13451 (95.6)      | 930 (85.3)         | <0.001 |
|                               | Died     | 613 (4.4)         | 160 (14.7)         |        |
| 365 Day Mortality (%)         | Survived | 12354 (87.8)      | 838 (76.9)         | <0.001 |
|                               | Died     | 1710 (12.2)       | 252 (23.1)         |        |
| Length of stay (median [IQR]) |          | 3.00 [2.00, 6.00] | 7.00 [4.00, 13.00] | <0.001 |

**FIGURES**

Figure 1. Flow chart of inclusion and exclusion of patients.

Figure 2. Unadjusted Forest Plot for AKI incidence amongst different units.

Point ranges report the AKI proportion of that centre and the associated 95% confidence interval. The solid horizontal line is the mean AKI incidence across all centres and the dashed lines represent the associated 95% and 99.8% confidence intervals.

Figure 3. Adjusted Forest Plot for AKI incidence amongst different units.

Point ranges represent the estimated conditional mode of the random intercept associated with each centre with the associated 95% confidence intervals. Brown points represent centres that deviate significantly from average and black points represent non-significant centres.

Figure 4a-c: Unadjusted Forest plot for 30-day, 90 day and 1 year mortality among different units. Point ranges report the proportion of mortality of that centre and the associated 95% confidence interval. The solid horizontal line is the mean mortality across all centres and the dashed lines represent the associated 95% and 99.8% confidence intervals.

1  
2  
3 1 REFERENCES  
4 2  
5

- 6 3 1 LCCOP 2019 Report | Society for Cardiothoracic Surgery. <https://scts.org/lccop-2019-report/> (accessed 11  
7 4 Mar 2021).
- 8
- 9 5 2 Personal communication. D.West. SCTS Thoracic Surgery Audit Lead. 8th March 2021.
- 10
- 11 6 3 Kidney Disease: Improving Global Outcomes (KDIGO) Acute Kidney Injury Work Group. KDIGO Clinical  
12 7 Practice Guideline for Acute Kidney Injury. *Kidney Int Suppl* 2012;**2**:1-138.  
13 8 [http://www.kisupplements.org/article/S2157-1716\(15\)31044-3/fulltext](http://www.kisupplements.org/article/S2157-1716(15)31044-3/fulltext) (accessed 26 Mar 2018).
- 14
- 15 9 4 Ishikawa S, Griesdale DEG, Lohser J. Acute kidney injury after lung resection surgery: incidence and  
16 10 perioperative risk factors. *Anesth Analg* 2012;**114**:1256–62. doi:10.1213/ANE.0b013e31824e2d20
- 17
- 18 11 5 Licker M, Cartier V, Robert J, *et al.* Risk Factors of Acute Kidney Injury According to RIFLE Criteria After  
19 12 Lung Cancer Surgery. *Ann Thorac Surg* 2011;**91**:844–50. doi:10.1016/j.athoracsur.2010.10.037
- 20
- 21 13 6 Cardinale D, Cosentino N, Moltrasio M, *et al.* Acute kidney injury after lung cancer surgery: Incidence and  
22 14 clinical relevance, predictors, and role of N-terminal pro B-type natriuretic peptide. *Lung Cancer*  
23 15 2018;**123**:155–9. doi:10.1016/j.lungcan.2018.07.009
- 24
- 25 16 7 Loeff BG, Epema AH, Smilde TD, *et al.* Immediate Postoperative Renal Function Deterioration in Cardiac  
26 17 Surgical Patients Predicts In-Hospital Mortality and Long-Term Survival. *J Am Soc Nephrol* 2005;**16**:195–  
27 18 200. doi:10.1681/ASN.2003100875
- 28
- 29 19 8 Lopez-Delgado JC, Esteve F, Torrado H, *et al.* Influence of acute kidney injury on short- and long-term  
30 20 outcomes in patients undergoing cardiac surgery: risk factors and prognostic value of a modified RIFLE  
31 21 classification. *Crit Care* 2013;**17**:R293. doi:10.1186/cc13159
- 32
- 33 22 9 Vives M, Wijeyesundera D, Marczin N, *et al.* Cardiac surgery-associated acute kidney injury. *Interact*  
34 23 *Cardiovasc Thorac Surg* 2014;**18**:637–45. doi:10.1093/icvts/ivu014
- 35
- 36 24 10 Acute Kidney Injury and Prognosis After Cardiopulmonary Bypass: A Meta-analysis of Cohort Studies -  
37 25 American Journal of Kidney Diseases. [https://www.ajkd.org/article/S0272-6386\(14\)01252-9/fulltext](https://www.ajkd.org/article/S0272-6386(14)01252-9/fulltext)  
38 26 (accessed 25 Jun 2019).
- 39 27 11 Bell S, Davey P, Nathwani D, *et al.* Risk of AKI with Gentamicin as Surgical Prophylaxis. *J Am Soc*  
40 28 *Nephrol* 2014;**25**:2625–32. doi:10.1681/ASN.2014010035
- 41
- 42 29 12 Naruka V, Mckie MA, Khushiwal R, *et al.* Acute kidney injury after thoracic surgery: a proposal for a  
43 30 multicentre evaluation (MERITS). *Interact Cardiovasc Thorac Surg* 2019;**29**:861–6.  
44 31 doi:10.1093/icvts/ivz184
- 45
- 46 32 13 Algorithm for detecting Acute Repeat Kidney Injury (AKI) based on serum creatinine changes with time  
47 33 This algorithm relates to the NHS England patient safety alert: NHS/PSA/D/2014/010.  
48 34 <zotero://attachment/611/> (accessed 25 Jun 2019).
- 49
- 50 35 14 MERITS Step by step video for data collection - YouTube.  
51 36 [https://www.youtube.com/watch?v=a\\_PVuXU3bP8&feature=youtu.be](https://www.youtube.com/watch?v=a_PVuXU3bP8&feature=youtu.be) (accessed 25 Jun 2019).
- 52
- 53 37 15 World Health Organization; Integrated care for older people: guidelines on community-level interventions to  
54 38 manage declines in intrinsic capacity. Geneva: World Health Organization; 2017. Licence: CC BY-NC-SA  
55 39 3.0 IGO. 2017.<http://iris.wpro.who.int/handle/10665.1/14475> (accessed 11 May 2022).
- 56
- 57 40 16 Oldest Old | Encyclopedia.com. [https://www.encyclopedia.com/social-sciences/encyclopedias-almanacs-  
58 41 transcripts-and-maps/oldest-old](https://www.encyclopedia.com/social-sciences/encyclopedias-almanacs-transcripts-and-maps/oldest-old) (accessed 11 May 2022).

- 1  
2  
3 1 17 Levy EM, Viscoli CM, Horwitz RI. The effect of acute renal failure on mortality. A cohort analysis. *JAMA*  
4 2 1996;**275**:1489–94.  
5  
6 3 18 O'Connor ME, Hewson RW, Kirwan CJ, *et al*. Acute kidney injury and mortality 1 year after major non-  
7 4 cardiac surgery. *Br J Surg* 2017;**104**:868–76. doi:10.1002/bjs.10498  
8  
9 5 19 Coca SG, Singanamala S, Parikh CR. Chronic kidney disease after acute kidney injury: a systematic review  
10 6 and meta-analysis. *Kidney Int* 2012;**81**:442–8. doi:10.1038/ki.2011.379  
11  
12 7 20 Doyle JF, Forni LG. Acute kidney injury: short-term and long-term effects. *Crit Care Lond Engl*  
13 8 2016;**20**:188. doi:10.1186/s13054-016-1353-y  
14  
15 9 21 Batchelor TJP, Rasburn NJ, Abdelnour-Berchtold E, *et al*. Guidelines for enhanced recovery after lung  
16 10 surgery: recommendations of the Enhanced Recovery After Surgery (ERAS®) Society and the European  
17 11 Society of Thoracic Surgeons (ESTS). *Eur J Cardio-Thorac Surg Off J Eur Assoc Cardio-Thorac Surg*  
18 12 2019;**55**:91–115. doi:10.1093/ejcts/ezy301  
19  
20 13 22 Getting It Right First Time - GIRFT. Get. It Right First Time - GIRFT.  
21 14 <http://www.gettingitrightfirsttime.co.uk/> (accessed 11 Mar 2021).  
22  
23 15  
24  
25  
26  
27  
28  
29  
30  
31  
32  
33  
34  
35  
36  
37  
38  
39  
40  
41  
42  
43  
44  
45  
46  
47  
48  
49  
50  
51  
52  
53  
54  
55  
56  
57  
58  
59  
60



**Total Patients (n = 15229)**

**Patients excluded (n = 75)**

**Incomplete data (n = 2)**

**Preoperative renal replacement therapy (n = 73)**

**Patients included in analysis  
(n = 15154)**

For peer review only - <http://bmjopen.bmj.com/site/about/guidelines.xhtml>



Conditional Estimates of random effects

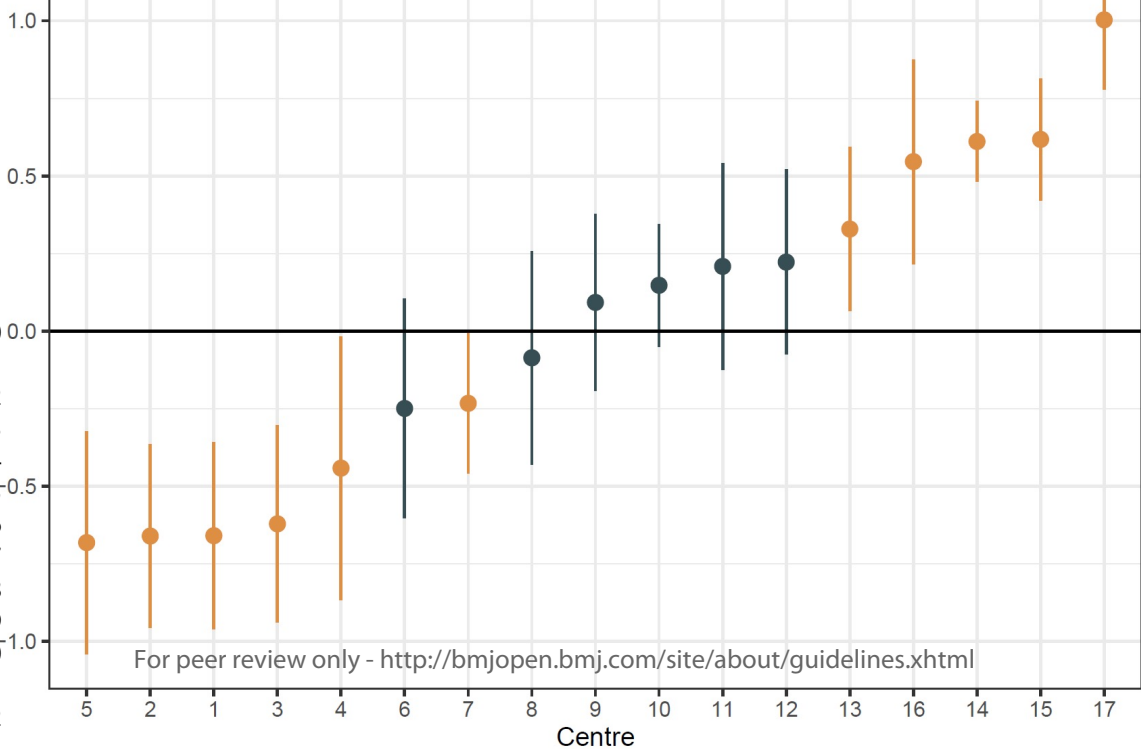

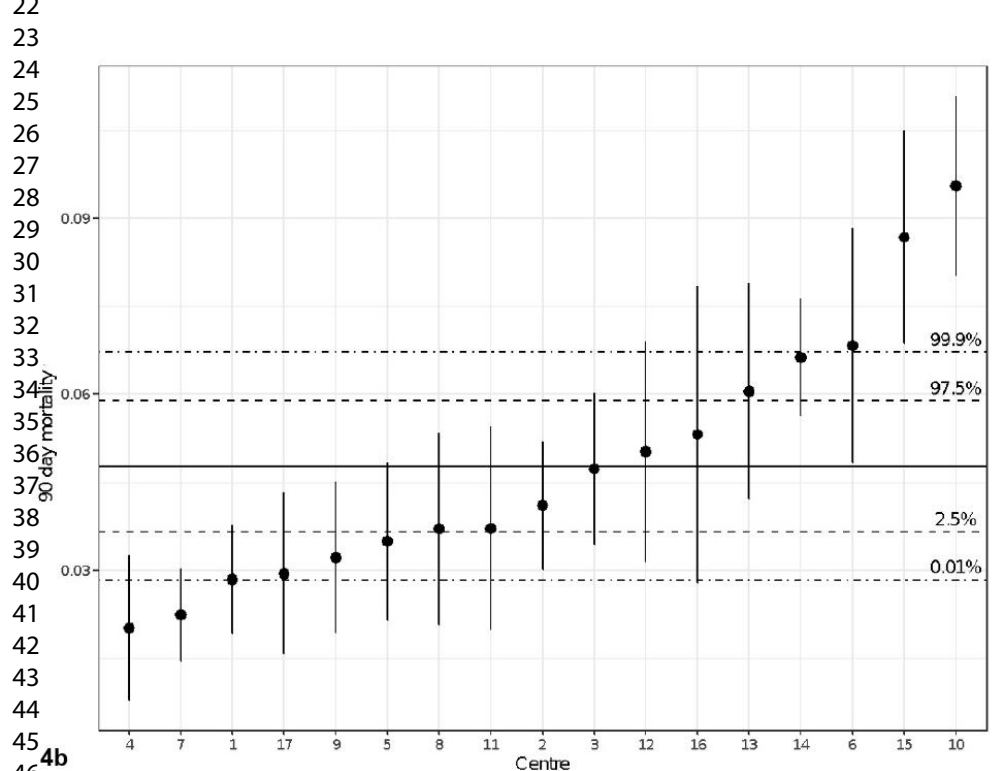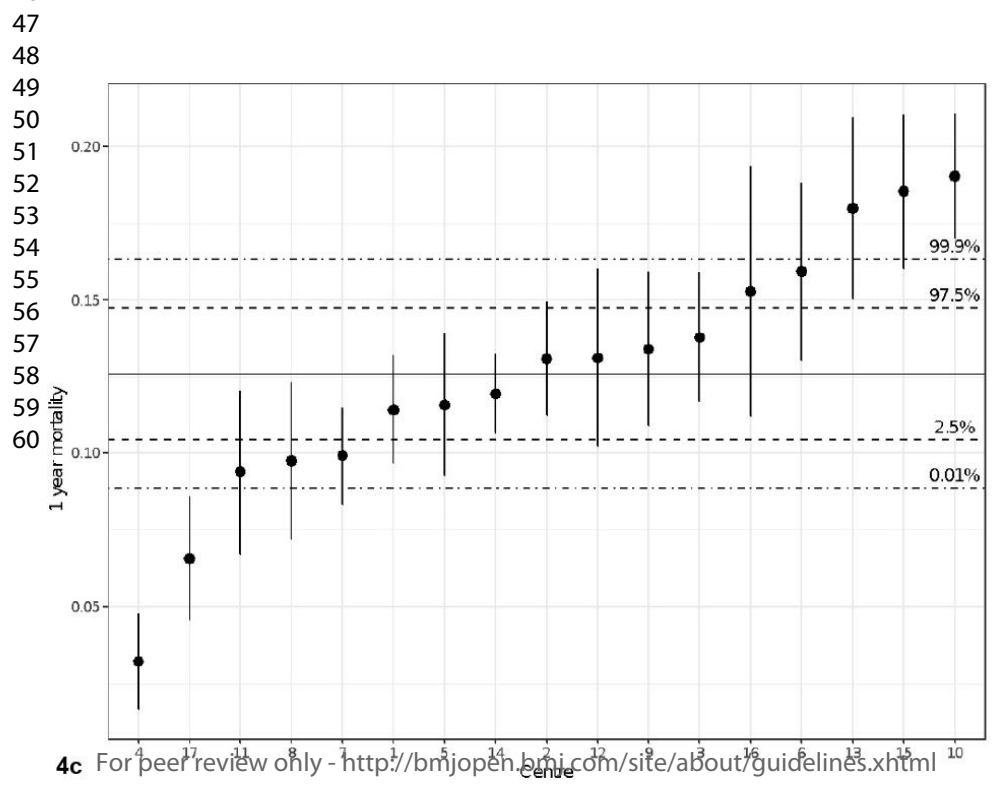

1  
2  
3 **Writing Committee:** V. Naruka, M.A. Mckie, N. Ahmadi, C. Pama, A.S. Coonar.  
4  
5

6  
7 **Steering committee:**

8 G. Aresu, A. Fry, S. Kendall, R. Page, C. Patvardhan, A. Peryt, R. Shah, D. West  
9 S. Wooley, S. Yung  
10

11  
12  
13 **Thoracic Centre Principal Investigators:**

14  
15 S. Stamenkovic (**Barts Health NHS Trust, London**), S. Shah (**Basildon University Hospital,**  
16 **Basildon**), A. Kirk (**Golden Jubilee National Hospital, Glasgow**), M. Loubani (**Hull University**  
17 **Teaching Hospitals NHS Trust, Hull**), J. Dunning (**James Cook University Hospital,**  
18 **Middlesbrough**), N. Chaudhuri and P. Tcherveniakov (**Leeds Teaching Hospitals NHS Trust,**  
19 **Leeds**), K. Rammohan (**Manchester University NHS Foundation Trust, Manchester**), J.  
20 Kadlec (**Norfolk and Norwich University Hospitals NHS Foundation Trust, Norfolk and**  
21 **Norwich**), A. Marchbank (**Plymouth Hospitals NHS Trust, Plymouth**), E.K.S Lim (**Royal**  
22 **Brompton and Harefield NHS Foundation Trust, London**), V. Zamvar (**Royal Infirmary of**  
23 **Edinburgh, Edinburgh**), A.S. Coonar (**Royal Papworth Hospital, Cambridge**), C. Tan (**St**  
24 **George's University Hospitals NHS Foundation Trust, London**), M. Hayward (**University**  
25 **College London Hospitals NHS Foundation Trust, London**), M. Kalkat (**University Hospitals**  
26 **Birmingham NHS Foundation Trust, Birmingham**), E. Woo (**University Hospital**  
27 **Southampton NHS Foundation Trust, Southampton**), V. Valtzoglou (**University Hospital of**  
28 **Wales, Cardiff**)  
29  
30  
31  
32  
33

34  
35 **Local Coordinators (\*) and Collaborators:**

36  
37 **Barts Health NHS Trust (London):** O. Asemota, C. Evans, M. Lee, E. F. Tan, N. J. Yong;  
38 **Basildon University Hospital (Basildon):** V. Caruso, R. Leatherby;  
39 **Golden Jubilee National Hospital (Glasgow):** E. Allen, H. Ismahel, A. Patra;  
40 **Hull University Teaching Hospitals NHS Trust (Hull):** V. Crispi, A. Fort-Schaale,  
41 J. Green, E. Isaac\*, J. Walshaw;  
42 **James Cook University Hospital (Middlesbrough):** C. P. Vidanapthirana\*, J. Trevis;  
43 **Leeds Teaching Hospitals NHS Trust (Leeds):** M. Ashraf, M. Jabeen, Z. Syla\*,  
44 S. Vijayapuri\*;  
45 **Manchester University NHS Foundation Trust (Manchester):** T. Eadington\*, B. Hama, O  
46 Karadakhy, M. Salehi\*, M. Taylor\*;  
47 **Norfolk and Norwich University Hospitals NHS Foundation Trust (Norfolk and Norwich):**  
48 M. Dixon, P. Njoku;  
49 **Plymouth Hospitals NHS Trust (Plymouth):** M. Halasa, N. Marshall, V. Palaniappan, L.  
50 Rogers\*;  
51 **Royal Brompton and Harefield NHS Foundation Trust (London):** S. K. Bains, Y. N. Bashir, A.  
52 K. Bolina, H. Chavan, L. H. Cheng, J. Donovan\*, A. G. Knighton, S. K. Longani, M. Nizami, P. D.  
53 Sousa\*, B. A. Taylor, J. J. Teh, S. Zaman;  
54 **Royal Infirmary of Edinburgh (Edinburgh):** L. Clark;  
55  
56  
57  
58  
59  
60

1  
2  
3 **Royal Papworth Hospital (Cambridge):** S. Cernic, H. Garland, A. Guéroult, V. Naruka\*, B.  
4 Ripoll, S. Saj, M. Tennyson;

5  
6 **St George's University Hospitals NHS Foundation Trust (London):** J. Abreu\*, V. Beynon, M.  
7 Kaur, A. Nogueiro, A. Patel, V. Rohilla, N. Sahdev\*, M. Sing, A. Sinha, J. Smelt\*, M. Witcomb;

8 **University College London Hospitals NHS Foundation Trust (London):** A. Antonopoulos\*, A.  
9 Valnarov-Boulter;

10 **University Hospitals Birmingham NHS Foundation Trust (Birmingham):** J. Cahill\*, S. Khan\*;

11 **University Hospital Southampton NHS Foundation Trust (Southampton):** X. Liu, A.

12 Tamburrini\*, A. Visan;

13 **University Hospital of Wales (Cardiff):** S. Algendy, T. Combellack\*, R. Karsan, M. Musab\*, A.  
14 Sayes, J. Williams\*, S. Zouwail\*;  
15  
16  
17  
18  
19  
20  
21  
22  
23  
24  
25  
26  
27  
28  
29  
30  
31  
32  
33  
34  
35  
36  
37  
38  
39  
40  
41  
42  
43  
44  
45  
46  
47  
48  
49  
50  
51  
52  
53  
54  
55  
56  
57  
58  
59  
60

**Supplementary file 1.****A LUNG RESECTIONS - PRIMARY-MALIGNANT**

- 1 Pneumonectomy including sleeve pneumonectomy
- 2 Lobectomy, bilobectomy
- 3 Sleeve resection lobectomy
- 4 Segmentectomy
- 5 Wedge resection
- 6 Any pulmonary resection with resection of chest wall, diaphragm etc
- 7 Exploratory procedure - no resection

**B LUNG RESECTIONS - ALL OTHER PATHOLOGIES**

- 1 Pneumonectomy
- 2 Lobectomy, bilobectomy
- 3 Sleeve resection
- 4 Segmentectomy
- 5 Wedge resection
- 6 Any pulmonary resection with resection of chest wall, diaphragm etc
- 7 Open lung volume reduction surgery for emphysema
- 8 Other pulmonary procedure

**C MESOTHELIOMA SURGERY (THERAPEUTIC)**

- 1 Extrapleural pneumonectomy
- 2 Extended pleurectomy / decortication
- 3 Pleurectomy/decortication
- 4 Partial pleurectomy

**D PLEURAL PROCEDURES - OTHER**

- 1 Decortication for empyema
- 2 Pneumothorax surgery (pleural symphysis +/- closure of air leak) Other pleural procedures

**E CHEST WALL/DIAPHRAGMATIC PROCEDURES**

1. Correction of pectus deformity (code Nuss/MIRPE in "thoroscopic" column)
- 2 Resection of primary chest wall tumour (not lung cancer)
- 3 Other major
- 4 Minor

**F MEDIASTINAL PROCEDURES**

- 1 Thymectomy for thymoma
- 2 Thymectomy for myasthenia gravis
- 3 Throidectomy

- 1
- 2
- 3 4 Resection of other mediastinal mass/tumour 5 Mediastinoscopy / mediastinotomy
- 4 6 Other mediastinal procedure
- 5
- 6

#### **G OESOPHAGEAL/GASTRIC PROCEDURES**

- 8 1 Oesophago-gastric resection - malignant
- 9 2 Oesophago-gastric resection - non-malignant
- 10 3 Other major oesophagogastric
- 11 4 Exploration only by any route for inoperable tumour 5 Minor oesophagogastric
- 12
- 13
- 14

#### **H TRACHEAL SURGERY (includes carinal resection)**

- 17 1 Tracheal resection - tumour
- 18 2 Tracheal resection - non-tumour
- 19
- 20

#### **I OTHER PROCEDURES**

- 23 1 Major
- 24 2 Minor
- 25
- 26

#### **VATS- A LUNG RESECTIONS - PRIMARY-MALIGNANT**

- 28 1 Pneumonectomy including sleeve pneumonectomy
- 29 2 Lobectomy, bilobectomy
- 30 3 Sleeve resection lobectomy
- 31 4 Segmentectomy
- 32 5 Wedge resection
- 33 6 Any pulmonary resection with resection of chest wall, diaphragm etc 7 Exploratory procedure - no
- 34 resection
- 35
- 36
- 37
- 38

#### **VATS- B LUNG RESECTIONS - ALL OTHER PATHOLOGIES**

- 41 1 Pneumonectomy
- 42 2 Lobectomy, bilobectomy
- 43 3 Sleeve resection lobectomy
- 44 4 Segmentectomy
- 45 5 Wedge resection
- 46 6 Any pulmonary resection with resection of chest wall, diaphragm etc 7 Open lung volume reduction
- 47 surgery for emphysema
- 48 8 Other pulmonary procedure
- 49
- 50
- 51
- 52

#### **VATS- C MESOTHELIOMA SURGERY (THERAPEUTIC)**

- 55 1 Extrapleural pneumonectomy
- 56 2 Extended pleurectomy / decortication
- 57 3 Pleurectomy/decortication
- 58 4 Partial pleurectomy
- 59
- 60



**VATS- D PLEURAL PROCEDURES - OTHER**

- 1 Decortication for empyema
- 2 Pneumothorax surgery (pleural symphysis +/- closure of air leak)
- 3 Other pleural procedures

**VATS- E CHEST WALL/DIAPHRAGMATIC PROCEDURES**

1. Correction of pectus deformity (code Nuss/MIRPE in "thoracoscopic" column) 2 Resection of primary chest wall tumour (not lung cancer)
- 3 Other major
- 4 Minor

**VATS- F MEDIASTINAL PROCEDURES**

- 1 Thymectomy for thymoma
- 2 Thymectomy for myasthenia gravis
- 3 Throidectomy
- 4 Resection of other mediastinal mass/tumour 5 Mediastinoscopy / mediastinotomy
- 6 Other mediastinal procedure

**VATS- G OESOPHAGEAL/GASTRIC PROCEDURES**

- 1 Oesophago-gastric resection - malignant
- 2 Oesophago-gastric resection - non-malignant
- 3 Other major oesophagogastric
- 4 Exploration only by any route for inoperable tumour
- 5 Minor oesophagogastric

**VATS- H TRACHEAL SURGERY (includes carinal resection)**

- 1 Tracheal resection - tumour
- 2 Tracheal resection - non-tumour

**VATS- I OTHER PROCEDURES**

- 1 Major
- 2 Minor

**Z Endoscopic Procedures (Not VATS)**

- 1 Therapeutic bronchoscopy
- 2 Therapeutic oesophagoscopy

## STROBE Statement—checklist of items that should be included in reports of observational studies

|                              | Item No | Recommendation                                                                                                                                                                                                                                                                                                                                                                                                                                                         | Page No |
|------------------------------|---------|------------------------------------------------------------------------------------------------------------------------------------------------------------------------------------------------------------------------------------------------------------------------------------------------------------------------------------------------------------------------------------------------------------------------------------------------------------------------|---------|
| <b>Title and abstract</b>    | 1       | (a) Indicate the study's design with a commonly used term in the title or the abstract                                                                                                                                                                                                                                                                                                                                                                                 | 4       |
|                              |         | (b) Provide in the abstract an informative and balanced summary of what was done and what was found                                                                                                                                                                                                                                                                                                                                                                    | 4       |
| <b>Introduction</b>          |         |                                                                                                                                                                                                                                                                                                                                                                                                                                                                        |         |
| Background/rationale         | 2       | Explain the scientific background and rationale for the investigation being reported                                                                                                                                                                                                                                                                                                                                                                                   | 5       |
| Objectives                   | 3       | State specific objectives, including any prespecified hypotheses                                                                                                                                                                                                                                                                                                                                                                                                       | 5       |
| <b>Methods</b>               |         |                                                                                                                                                                                                                                                                                                                                                                                                                                                                        |         |
| Study design                 | 4       | Present key elements of study design early in the paper                                                                                                                                                                                                                                                                                                                                                                                                                | 5       |
| Setting                      | 5       | Describe the setting, locations, and relevant dates, including periods of recruitment, exposure, follow-up, and data collection                                                                                                                                                                                                                                                                                                                                        | 5,6     |
| Participants                 | 6       | (a) <i>Cohort study</i> —Give the eligibility criteria, and the sources and methods of selection of participants. Describe methods of follow-up<br><i>Case-control study</i> —Give the eligibility criteria, and the sources and methods of case ascertainment and control selection. Give the rationale for the choice of cases and controls<br><i>Cross-sectional study</i> —Give the eligibility criteria, and the sources and methods of selection of participants | 5,6     |
|                              |         | (b) <i>Cohort study</i> —For matched studies, give matching criteria and number of exposed and unexposed<br><i>Case-control study</i> —For matched studies, give matching criteria and the number of controls per case                                                                                                                                                                                                                                                 |         |
| Variables                    | 7       | Clearly define all outcomes, exposures, predictors, potential confounders, and effect modifiers. Give diagnostic criteria, if applicable                                                                                                                                                                                                                                                                                                                               | 5,6     |
| Data sources/<br>measurement | 8*      | For each variable of interest, give sources of data and details of methods of assessment (measurement). Describe comparability of assessment methods if there is more than one group                                                                                                                                                                                                                                                                                   | 5,6     |
| Bias                         | 9       | Describe any efforts to address potential sources of bias                                                                                                                                                                                                                                                                                                                                                                                                              | 5,6     |
| Study size                   | 10      | Explain how the study size was arrived at                                                                                                                                                                                                                                                                                                                                                                                                                              | 6       |
| Quantitative variables       | 11      | Explain how quantitative variables were handled in the analyses. If applicable, describe which groupings were chosen and why                                                                                                                                                                                                                                                                                                                                           | 5,6     |
| Statistical methods          | 12      | (a) Describe all statistical methods, including those used to control for confounding                                                                                                                                                                                                                                                                                                                                                                                  | 6       |
|                              |         | (b) Describe any methods used to examine subgroups and interactions                                                                                                                                                                                                                                                                                                                                                                                                    | 6       |
|                              |         | (c) Explain how missing data were addressed                                                                                                                                                                                                                                                                                                                                                                                                                            | 5,6     |
|                              |         | (d) <i>Cohort study</i> —If applicable, explain how loss to follow-up was addressed<br><i>Case-control study</i> —If applicable, explain how matching of cases and controls was addressed<br><i>Cross-sectional study</i> —If applicable, describe analytical methods taking account of sampling strategy                                                                                                                                                              | 5,6     |
|                              |         | (e) Describe any sensitivity analyses                                                                                                                                                                                                                                                                                                                                                                                                                                  | 6       |

Continued on next page

| <b>Results</b>           |     |                                                                                                                                                                                                              |        |
|--------------------------|-----|--------------------------------------------------------------------------------------------------------------------------------------------------------------------------------------------------------------|--------|
| Participants             | 13* | (a) Report numbers of individuals at each stage of study—eg numbers potentially eligible, examined for eligibility, confirmed eligible, included in the study, completing follow-up, and analysed            | 5,6    |
|                          |     | (b) Give reasons for non-participation at each stage                                                                                                                                                         | 5,6    |
|                          |     | (c) Consider use of a flow diagram                                                                                                                                                                           | 5,6,14 |
| Descriptive data         | 14* | (a) Give characteristics of study participants (eg demographic, clinical, social) and information on exposures and potential confounders                                                                     | 5,6,7  |
|                          |     | (b) Indicate number of participants with missing data for each variable of interest                                                                                                                          | 5,6,7  |
|                          |     | (c) <i>Cohort study</i> —Summarise follow-up time (eg, average and total amount)                                                                                                                             |        |
| Outcome data             | 15* | <i>Cohort study</i> —Report numbers of outcome events or summary measures over time                                                                                                                          |        |
|                          |     | <i>Case-control study</i> —Report numbers in each exposure category, or summary measures of exposure                                                                                                         |        |
|                          |     | <i>Cross-sectional study</i> —Report numbers of outcome events or summary measures                                                                                                                           | 7,8    |
| Main results             | 16  | (a) Give unadjusted estimates and, if applicable, confounder-adjusted estimates and their precision (eg, 95% confidence interval). Make clear which confounders were adjusted for and why they were included | 7,8    |
|                          |     | (b) Report category boundaries when continuous variables were categorized                                                                                                                                    | 7,8    |
|                          |     | (c) If relevant, consider translating estimates of relative risk into absolute risk for a meaningful time period                                                                                             |        |
| Other analyses           | 17  | Report other analyses done—eg analyses of subgroups and interactions, and sensitivity analyses                                                                                                               | 7,8    |
| <b>Discussion</b>        |     |                                                                                                                                                                                                              |        |
| Key results              | 18  | Summarise key results with reference to study objectives                                                                                                                                                     | 8      |
| Limitations              | 19  | Discuss limitations of the study, taking into account sources of potential bias or imprecision. Discuss both direction and magnitude of any potential bias                                                   | 9      |
| Interpretation           | 20  | Give a cautious overall interpretation of results considering objectives, limitations, multiplicity of analyses, results from similar studies, and other relevant evidence                                   | 8,9    |
| Generalisability         | 21  | Discuss the generalisability (external validity) of the study results                                                                                                                                        | 8,9    |
| <b>Other information</b> |     |                                                                                                                                                                                                              |        |
| Funding                  | 22  | Give the source of funding and the role of the funders for the present study and, if applicable, for the original study on which the present article is based                                                | 2      |

\*Give information separately for cases and controls in case-control studies and, if applicable, for exposed and unexposed groups in cohort and cross-sectional studies.

**Note:** An Explanation and Elaboration article discusses each checklist item and gives methodological background and published examples of transparent reporting. The STROBE checklist is best used in conjunction with this article (freely available on the Web sites of PLoS Medicine at <http://www.plosmedicine.org/>, Annals of Internal Medicine at <http://www.annals.org/>, and Epidemiology at <http://www.epidem.com/>). Information on the STROBE Initiative is available at [www.strobe-statement.org](http://www.strobe-statement.org).
