# Supplementary material for: Multicentre evaluation of renal impairment in thoracic surgery (MERITS): a retrospective cohort study
Source: HighWire-hosted journal article supplement (doi:10.1136/bmjopen-2021-058542), 2022-09-01
Supplement: bmjopen-2021-058542supp001_data_supplement.pdf [file bmjopen-2021-058542supp001_data_supplement.pdf]

**Supplementary file 1.****A LUNG RESECTIONS - PRIMARY-MALIGNANT**

- 1 Pneumonectomy including sleeve pneumonectomy
- 2 Lobectomy, bilobectomy
- 3 Sleeve resection lobectomy
- 4 Segmentectomy
- 5 Wedge resection
- 6 Any pulmonary resection with resection of chest wall, diaphragm etc
- 7 Exploratory procedure - no resection

**B LUNG RESECTIONS - ALL OTHER PATHOLOGIES**

- 1 Pneumonectomy
- 2 Lobectomy, bilobectomy
- 3 Sleeve resection
- 4 Segmentectomy
- 5 Wedge resection
- 6 Any pulmonary resection with resection of chest wall, diaphragm etc
- 7 Open lung volume reduction surgery for emphysema
- 8 Other pulmonary procedure

**C MESOTHELIOMA SURGERY (THERAPEUTIC)**

- 1 Extrapleural pneumonectomy
- 2 Extended pleurectomy / decortication
- 3 Pleurectomy/decortication
- 4 Partial pleurectomy

**D PLEURAL PROCEDURES - OTHER**

- 1 Decortication for empyema
- 2 Pneumothorax surgery (pleural symphysis +/- closure of air leak) Other pleural procedures

**E CHEST WALL/DIAPHRAGMATIC PROCEDURES**

1. Correction of pectus deformity (code Nuss/MIRPE in "thoracoscopic" column)
- 2 Resection of primary chest wall tumour (not lung cancer)
- 3 Other major
- 4 Minor

**F MEDIASTINAL PROCEDURES**

- 1 Thymectomy for thymoma
- 2 Thymectomy for myasthenia gravis
- 3 Throidectomy

- 4 Resection of other mediastinal mass/tumour
- 5 Mediastinoscopy / mediastinotomy
- 6 Other mediastinal procedure

#### **G OESOPHAGEAL/GASTRIC PROCEDURES**

- 1 Oesophago-gastric resection - malignant
- 2 Oesophago-gastric resection - non-malignant
- 3 Other major oesophagogastric
- 4 Exploration only by any route for inoperable tumour
- 5 Minor oesophagogastric

#### **H TRACHEAL SURGERY (includes carinal resection)**

- 1 Tracheal resection - tumour
- 2 Tracheal resection - non-tumour

#### **I OTHER PROCEDURES**

- 1 Major
- 2 Minor

#### **VATS- A LUNG RESECTIONS - PRIMARY-MALIGNANT**

- 1 Pneumonectomy including sleeve pneumonectomy
- 2 Lobectomy, bilobectomy
- 3 Sleeve resection lobectomy
- 4 Segmentectomy
- 5 Wedge resection
- 6 Any pulmonary resection with resection of chest wall, diaphragm etc
- 7 Exploratory procedure - no resection

#### **VATS- B LUNG RESECTIONS - ALL OTHER PATHOLOGIES**

- 1 Pneumonectomy
- 2 Lobectomy, bilobectomy
- 3 Sleeve resection lobectomy
- 4 Segmentectomy
- 5 Wedge resection
- 6 Any pulmonary resection with resection of chest wall, diaphragm etc
- 7 Open lung volume reduction surgery for emphysema
- 8 Other pulmonary procedure

#### **VATS- C MESOTHELIOMA SURGERY (THERAPEUTIC)**

- 1 Extrapleural pneumonectomy
- 2 Extended pleurectomy / decortication
- 3 Pleurectomy/decortication
- 4 Partial pleurectomy

**VATS- D PLEURAL PROCEDURES - OTHER**

- 1 Decortication for empyema
- 2 Pneumothorax surgery (pleural symphysis +/- closure of air leak)
- 3 Other pleural procedures

**VATS- E CHEST WALL/DIAPHRAGMATIC PROCEDURES**

1. Correction of pectus deformity (code Nuss/MIRPE in "thoracoscopic" column)
- 2 Resection of primary chest wall tumour (not lung cancer)
- 3 Other major
- 4 Minor

**VATS- F MEDIASTINAL PROCEDURES**

- 1 Thymectomy for thymoma
- 2 Thymectomy for myasthenia gravis
- 3 Throidectomy
- 4 Resection of other mediastinal mass/tumour
- 5 Mediastinoscopy / mediastinotomy
- 6 Other mediastinal procedure

**VATS- G OESOPHAGEAL/GASTRIC PROCEDURES**

- 1 Oesophago-gastric resection - malignant
- 2 Oesophago-gastric resection - non-malignant
- 3 Other major oesophagogastric
- 4 Exploration only by any route for inoperable tumour
- 5 Minor oesophagogastric

**VATS- H TRACHEAL SURGERY (includes carinal resection)**

- 1 Tracheal resection - tumour
- 2 Tracheal resection - non-tumour

**VATS- I OTHER PROCEDURES**

- 1 Major
- 2 Minor

**Z Endoscopic Procedures (Not VATS)**

- 1 Therapeutic bronchoscopy
- 2 Therapeutic oesophagoscopy
